# Supplementary material for: Differences in pseudogene evolution contributed to the contrasting flavors of turnip and Chiifu, two Brassica rapa subspecies
Source: PubMed Central journal article supplement — Plant Commun. 2022 Sep 2;4(1):100427. doi: 10.1016/j.xplc.2022.100427 (PMC9860189; doi:10.1016/j.xplc.2022.100427), 2022-09-02
Supplement: mmc1.pdf [file mmc1.pdf]

**Plant Communications, Volume 4**

**Supplemental information**

**Differences in pseudogene evolution contributed to the contrasting flavors of turnip and Chiifu, two *Brassica rapa* subspecies**

**Xin Yin, Danni Yang, Youjie Zhao, Xingyu Yang, Zhili Zhou, Xudong Sun, Xiangxiang Kong, Xiong Li, Guangyan Wang, Yuanwen Duan, Yunqiang Yang, and Yongping Yang**

1 Differences in pseudogene evolution contributed to the contrasting flavors of turnip  
2 and Chiifu, two *Brassica rapa* subspecies

3

4 Xin Yin<sup>1,2,3,6</sup>, Danni Yang<sup>1,2,3,5,6</sup>, Youjie Zhao<sup>4,6</sup>, Xingyu Yang<sup>1,2,3,5,6</sup>, Zhili Zhou<sup>1,2,3,6</sup>,  
5 Xudong Sun<sup>1,2,3</sup>, Xiangxiang Kong<sup>1,2,3</sup>, Xiong Li<sup>1,2,3</sup>, Guangyan Wang<sup>1,2,3</sup>, Yuanwen  
6 Duan<sup>1,2,3</sup>, Yunqiang Yang<sup>1,2,3\*</sup>, Yongping Yang<sup>1,2,3\*</sup>

7

8 <sup>1</sup>Plant Germplasm and Genomics Center, Kunming Institute of Botany, Chinese  
9 Academy of Sciences, Kunming 650201, China

10 <sup>2</sup>Key Laboratory for Plant Diversity and Biogeography of East Asia, Kunming Institute  
11 of Botany, Chinese Academy of Science, Kunming, 650204, China

12 <sup>3</sup>Institute of Tibetan Plateau Research at Kunming, Kunming Institute of Botany,  
13 Chinese Academy of Sciences, Kunming, 650201, China

14 <sup>4</sup>College of Big Data and Intelligent Engineering, Southwest Forestry University,  
15 Kunming, Yunnan, China

16 <sup>5</sup>University of Chinese Academy of Sciences, Beijing, 100049, China

17 <sup>6</sup> These authors contributed equally to this work.

18 \*Corresponding author:

19 Yunqiang Yang

20 Email: [yangyunqiang@mail.kib.ac.cn](mailto:yangyunqiang@mail.kib.ac.cn), Phone: 86-871-65223398

21 Yongping Yang

22 Email: [yangyp@mail.kib.ac.cn](mailto:yangyp@mail.kib.ac.cn), Phone: 86-871-65223398, ORCID: [0000-0002-0327-  
23 2664](https://orcid.org/0000-0002-0327-2664)

24

25

26

27

28

29

## Supplemental Figures

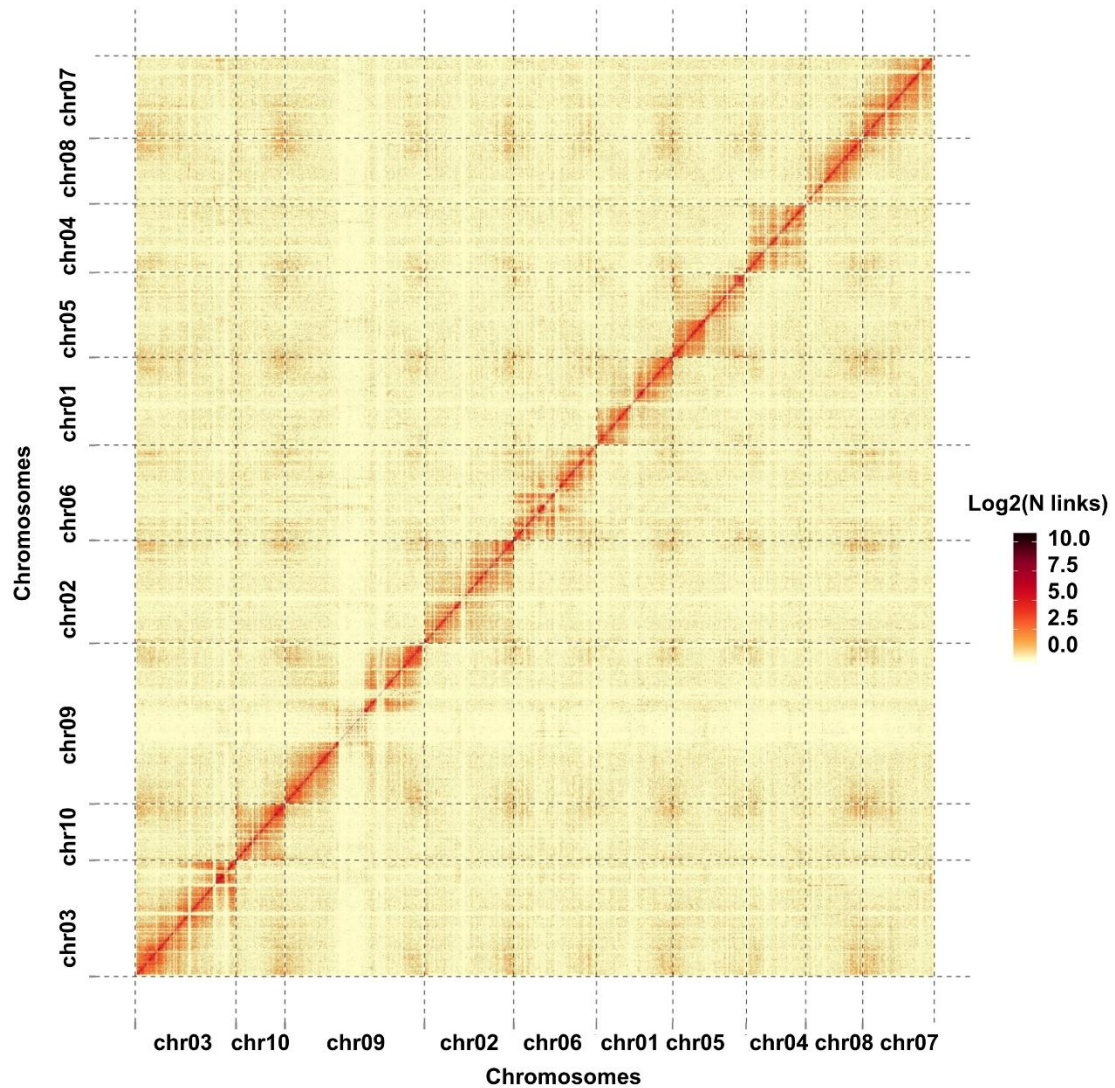

31

32 **Supplemental Figure 1. Hi-C-assisted assembly of turnip pseudomolecules.** The  
33 heat map presents the Hi-C chromosomal interactions (100 kb resolution). chr01–chr10,  
34 10 turnip chromosomes. The x- and y-axes present the order of the positions of scaffolds  
35 on the corresponding pseudochromosomes.

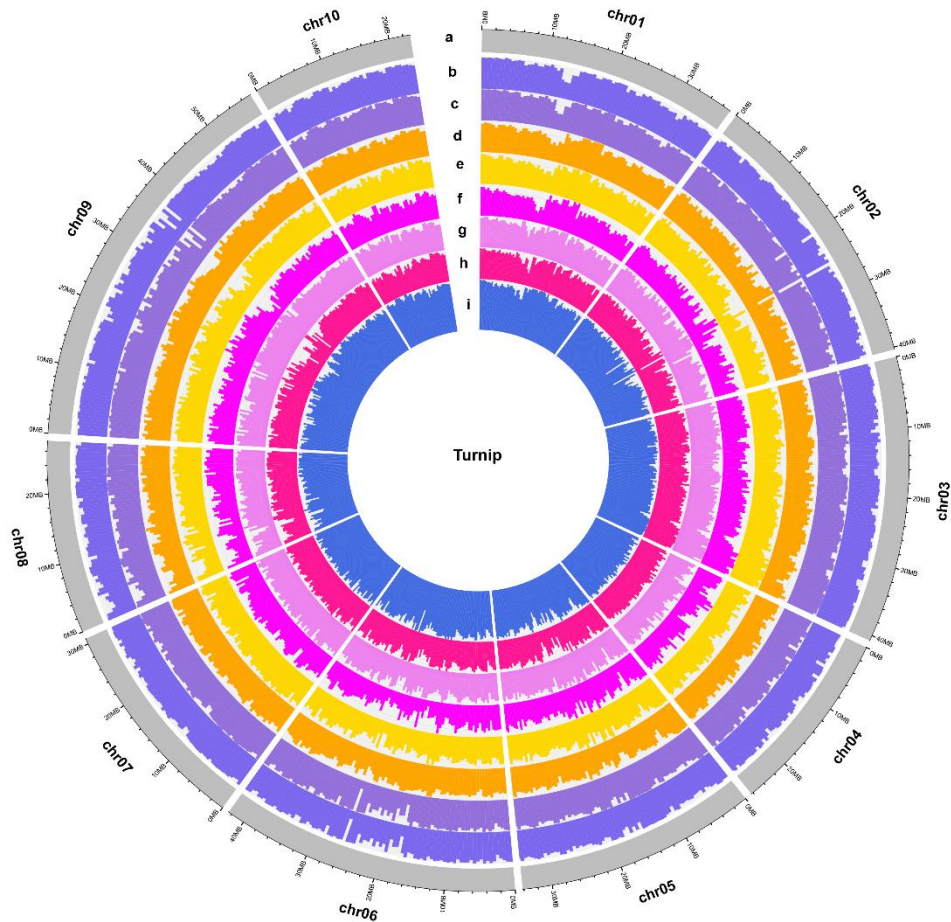

36  
 37 **Supplemental Figure 2. Turnip, ECD04, TUA, and TUE Illumina paired-end reads**  
 38 **(NGS) and 48A resequencing reads (48Aresseq 1–3) from a turnip population were**  
 39 **mapped to turnip chromosomes. a, chr1–chr10, circular representation of the**  
 40 **pseudomolecules of turnip; b–f, turnip-DO1 NGS, turnip-DO2 NGS, ECD04 NGS,**  
 41 **TUA NGS, and TUE NGS reads mapped to turnip chromosomes; g–i, 48A**  
 42 **resequencing reads (48Aresseq 1–3) from a turnip population mapped to turnip**  
 43 **chromosomes.**

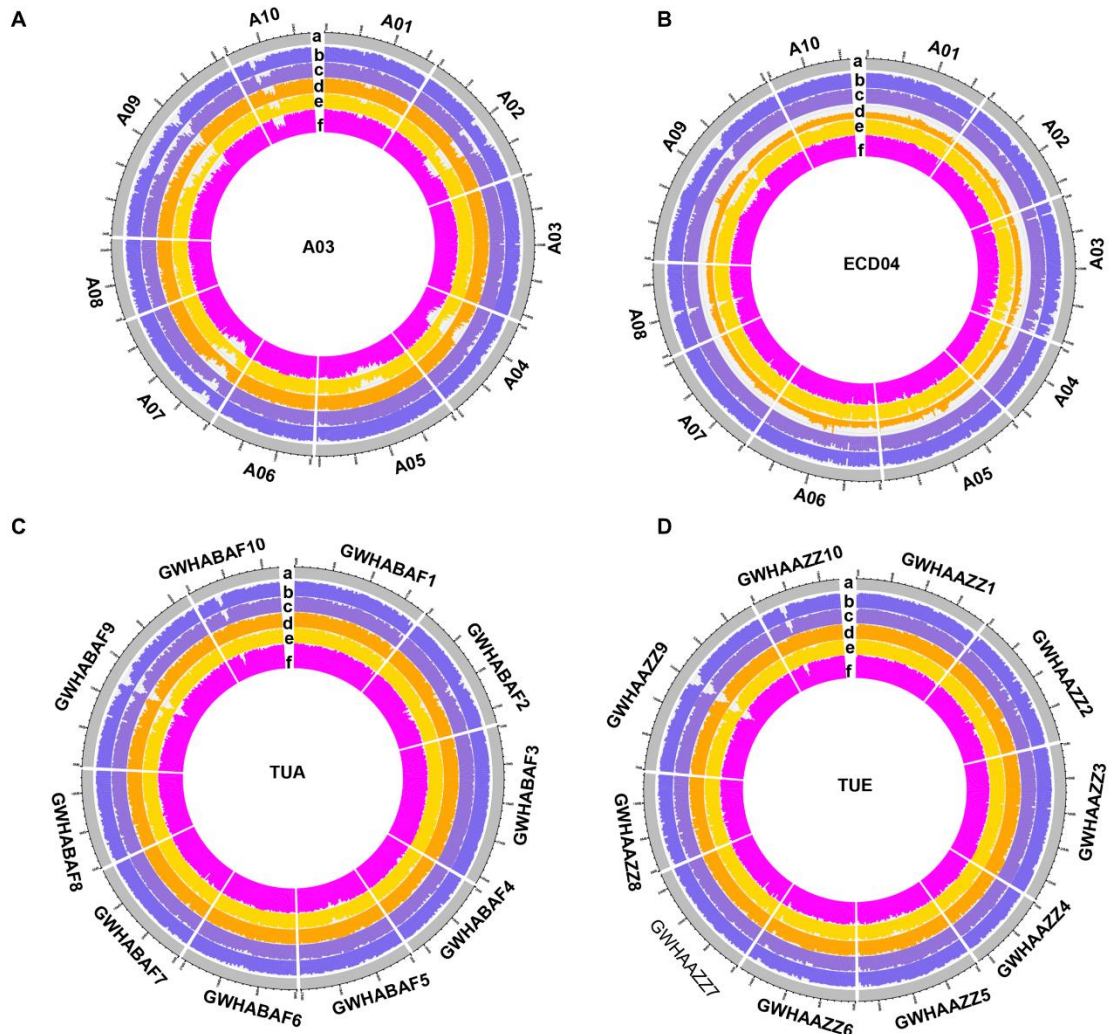

44  
 45 **Supplemental Figure 3. Turnip Illumina paired-end reads (NGS) and 48A**  
 46 **resequencing reads (48Aresseq 1–3) from a turnip population were mapped to A03,**  
 47 **ECD04, TUA, and TUE chromosomes (A–D). a, circular representation of the**  
 48 **pseudomolecules of A03, ECD04, TUA, and TUE; b–c, turnip-DO1 NGS and turnip-**  
 49 **DO2 NGS reads; d–f, 48A resequencing reads (48Aresseq 1–3) from a turnip population**  
 50 **mapped to turnip chromosomes.**

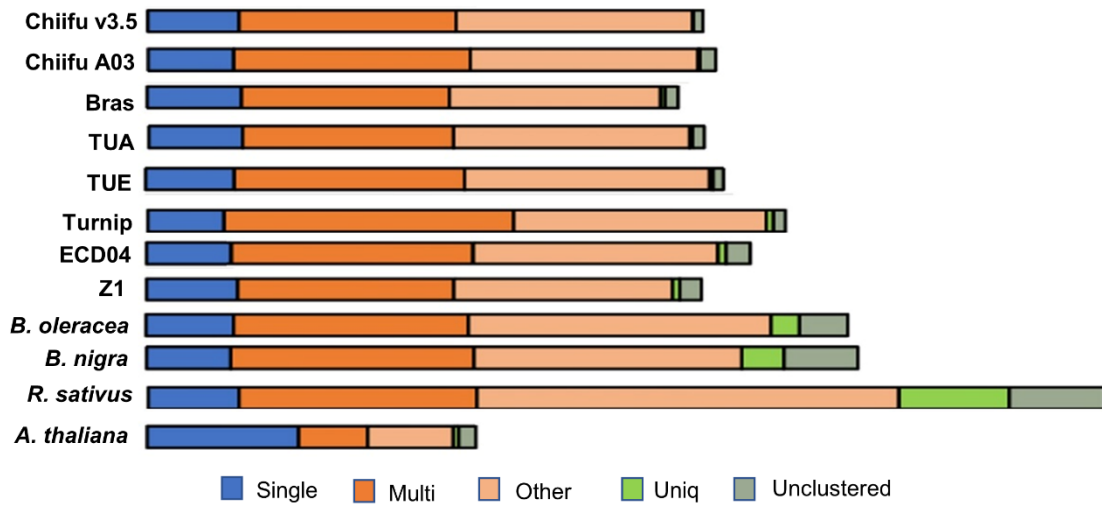

51

52 **Supplemental Figure 4. Comparison of the number of gene families in the turnip**

53 **genome and in the genomes of other diploid *Brassica* species and *A. thaliana*.**

54

55

56

57

58

59

60

61

62

63

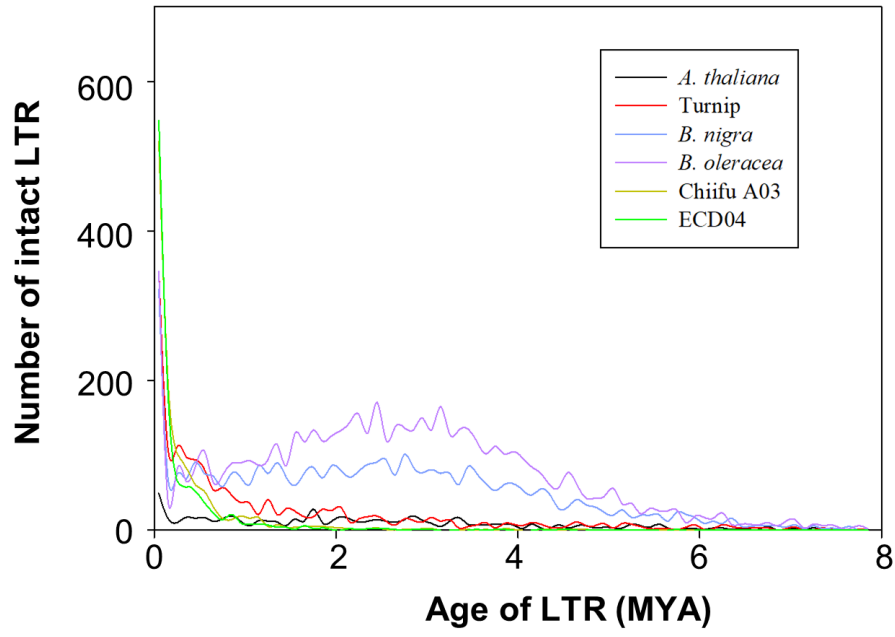

64

65 **Supplemental Figure 5. Distribution of the LTR retrotransposon insertion times.**

66

67

68

69

70

71

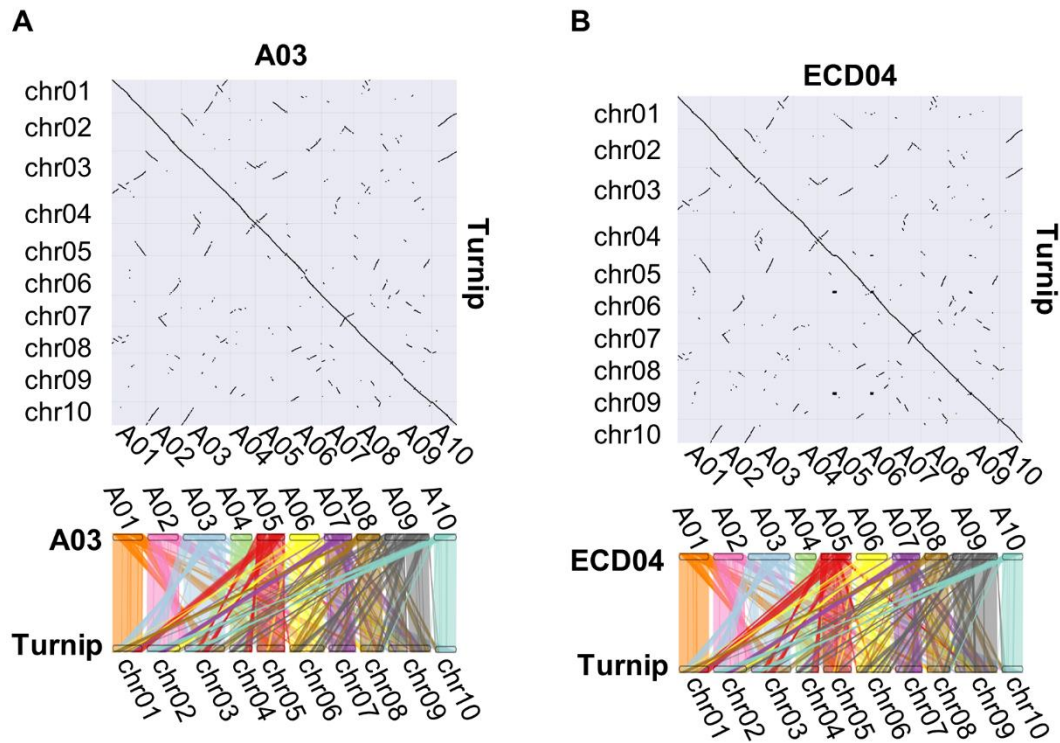

72

73 **Supplemental Figure 6. Dot plot for the segmental collinearity between the turnip**  
 74 **and Chiifu A03 genomes (A) and between the turnip and ECD04 genomes (B).**

75 Chiifu A03 and ECD04 chromosomes are presented in different colors, whereas  
 76 orthologous chromosomal segments in turnip are presented in the same color.

77 Conserved collinear blocks of gene models are presented for the 10 turnip  
 78 chromosomes and the ECD04 and Chiifu A03 genomes.

79

80

81

82

83

84



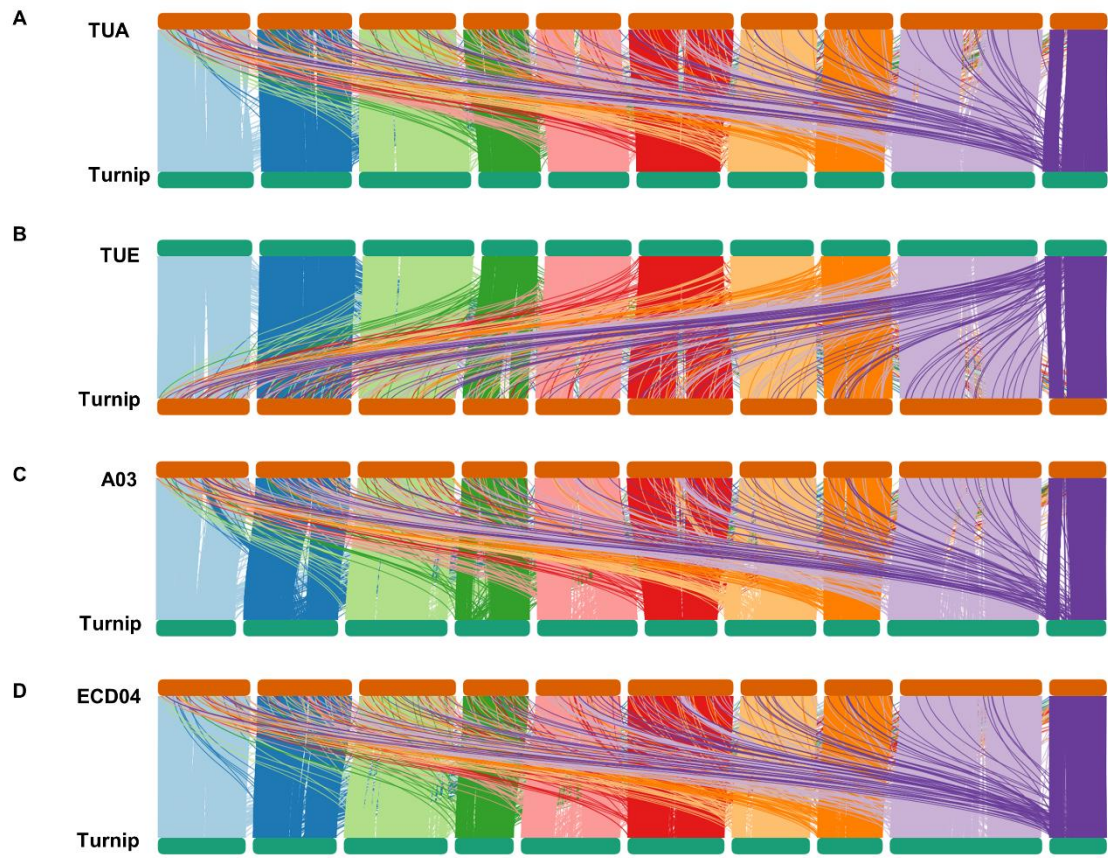

85

86 **Supplemental Figure 7. Sequence collinearity between the turnip genome and the**

87 **TUA, TUE, Chiifu A03, and ECD04 genomes as determined by MUMmer.**

88

89

90

91

92

93

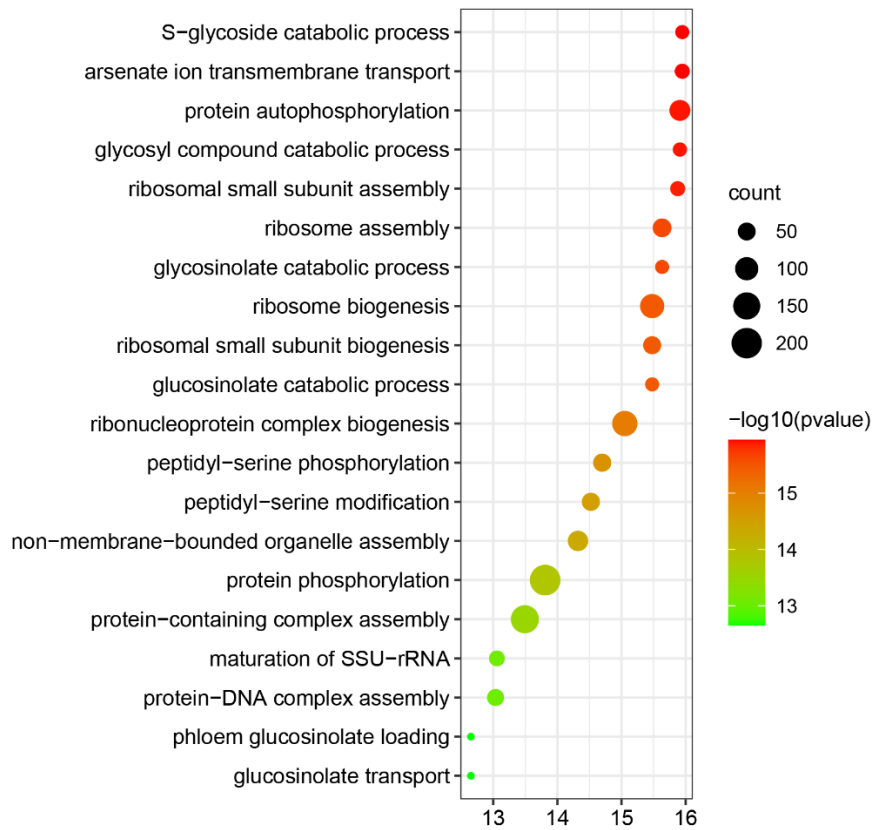

94  
95  
96  
97  
98  
99  
100  
101  
102  
103  
104  
105  
106  
107  
108  
109  
110

**Supplemental Figure 8. Results of the GO enrichment analysis of the most significantly expanded gene families in Chiifu A03.** The enrichment factor, which indicates the degree of enrichment, was calculated as the ratio between the number of genes in the expanded families and all of the annotated genes in the pathway. The 15 most significantly enriched pathways are shown.

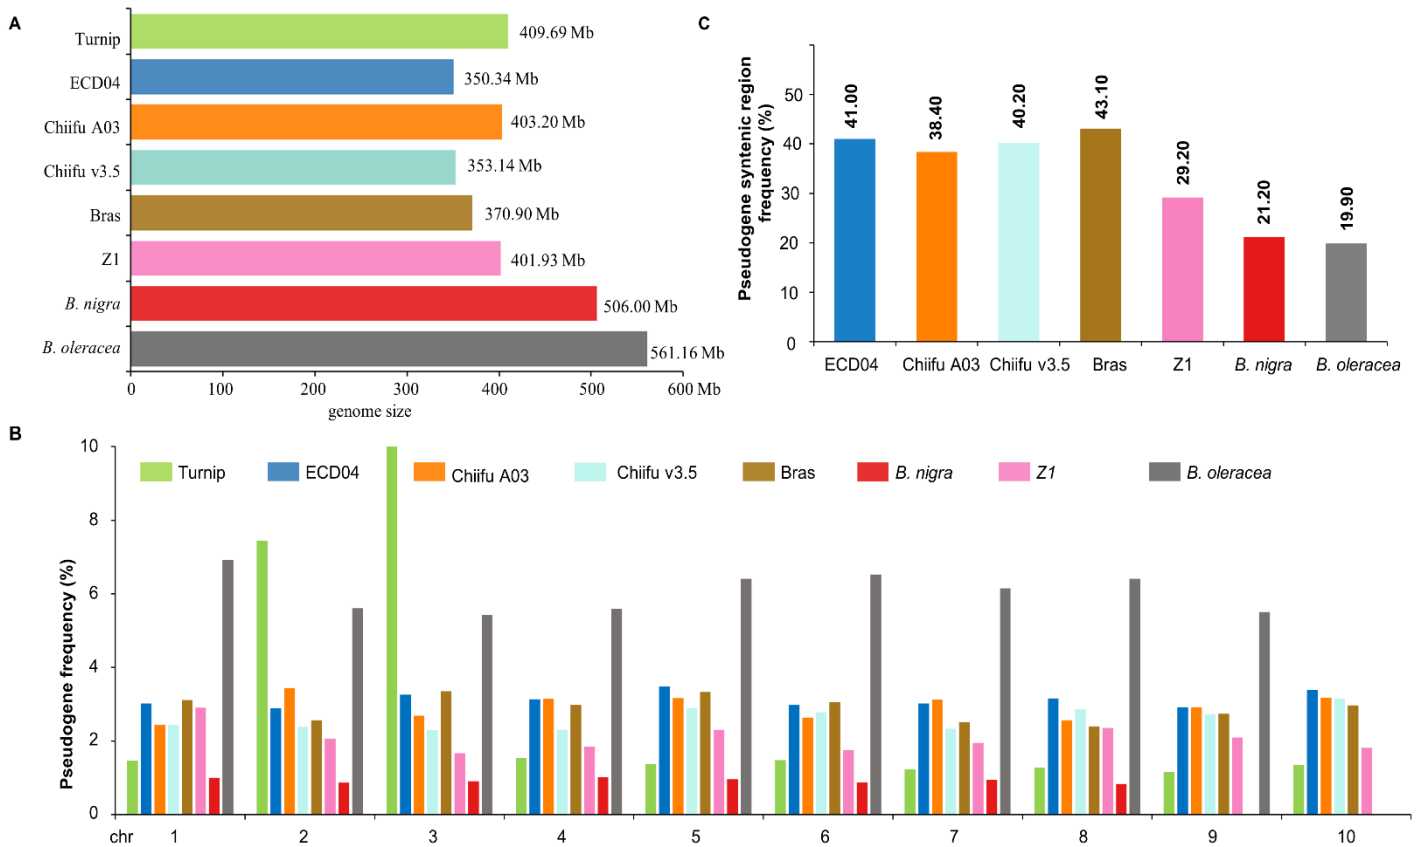

111 **Supplemental Figure 9. Comparison of the pseudogenes in *Brassica***  
 112 **species/subspecies.**

113 **(A)** Comparison of the genome sizes of *Brassica* species/subspecies, including turnip,  
 114 ECD04, Chiifu A03, Chiifu v3.5, *B. rapa\_chinensis* (Bras), *B. rapa* Z1, *B. nigra*, and  
 115 *B. oleracea*

116 **(B)** Comparison of the pseudogene frequency (%) for each chromosome in *Brassica*  
 117 species/subspecies. The y-axis presents the ratio of the pseudogene length to the  
 118 chromosome length in *Brassica* species/subspecies. The x-axis presents the  
 119 corresponding chromosome numbers.

120 **(C)** Synteny (%) between turnip and other species/subspecies.

121  
 122  
 123  
 124  
 125  
 126

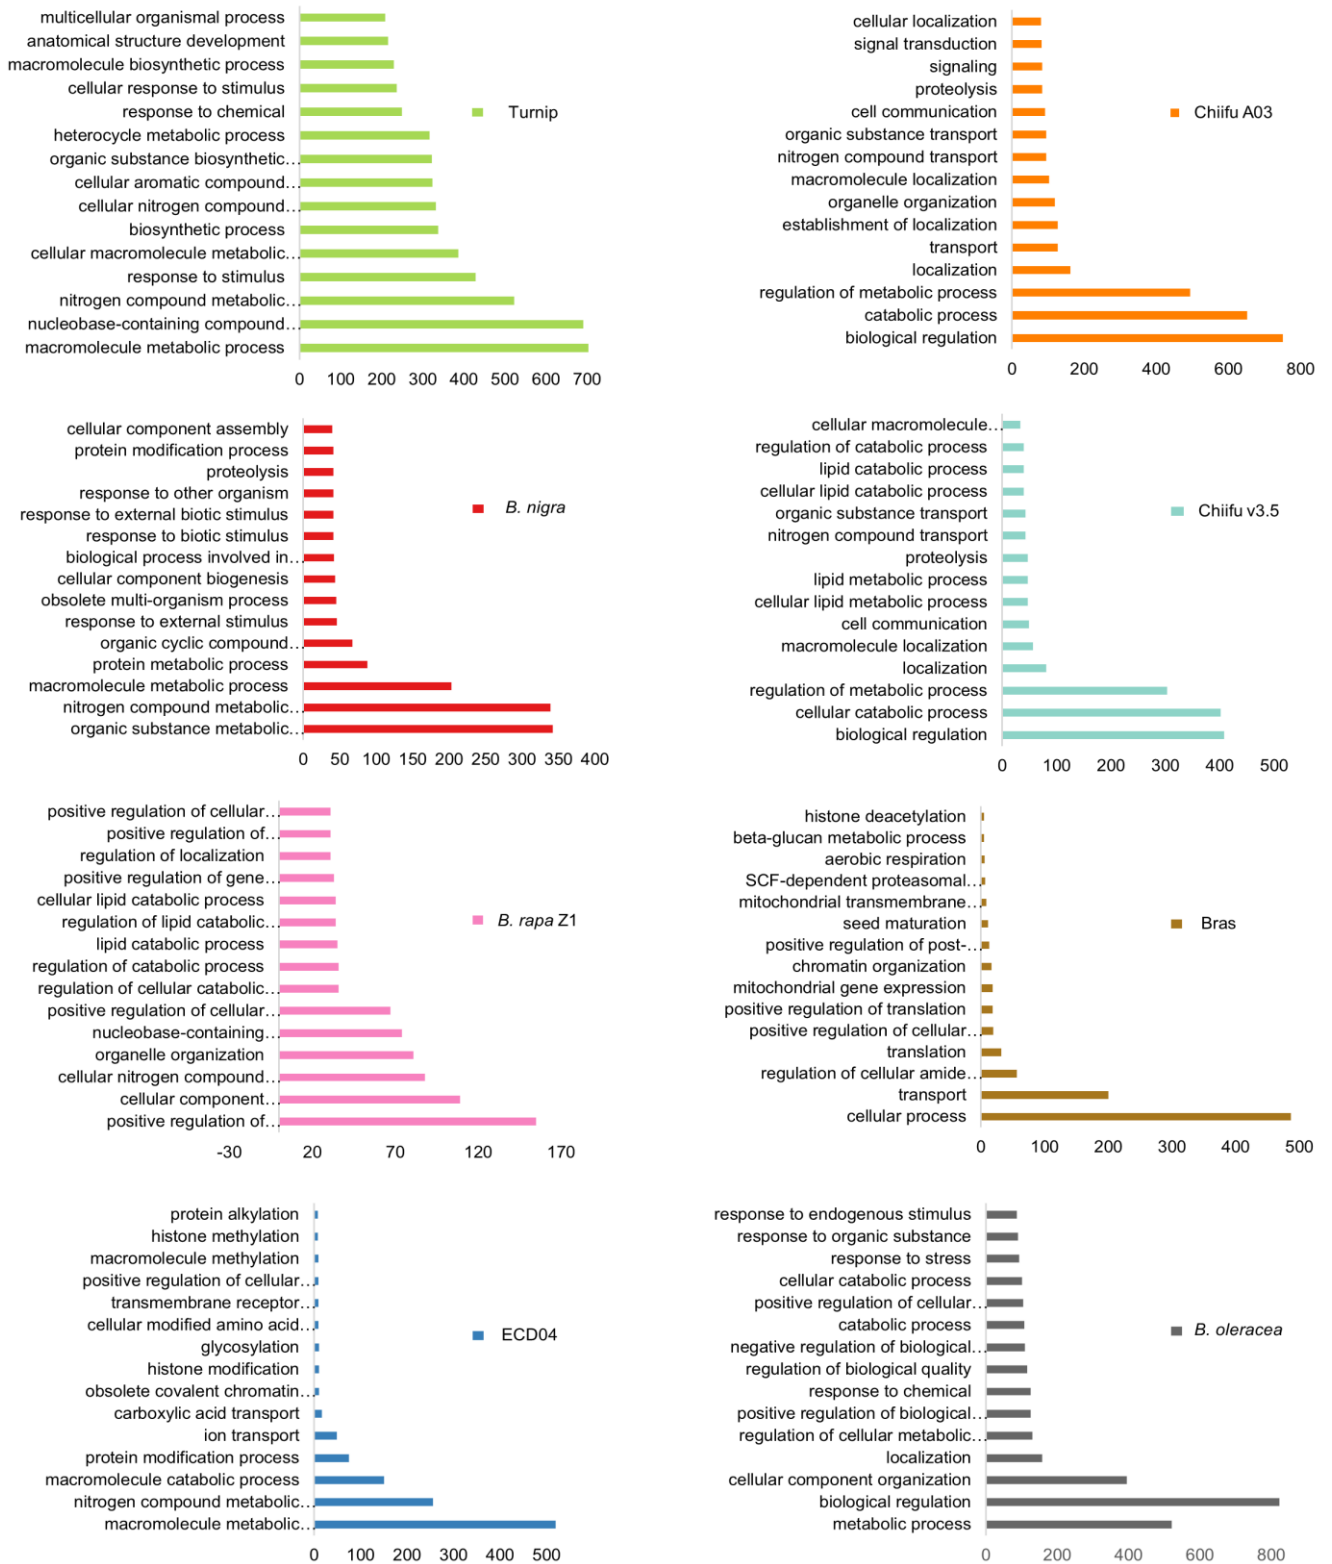

127 **Supplemental Figure 10. Gene Ontology (GO)-based functional annotation of**  
 128 **pseudogenes in *Brassica* species/subspecies.** The GO enrichment analysis of the  
 129 pseudogenes in *Brassica* species/subspecies was performed on the basis of the  
 130 annotations of the closest functional paralogs.

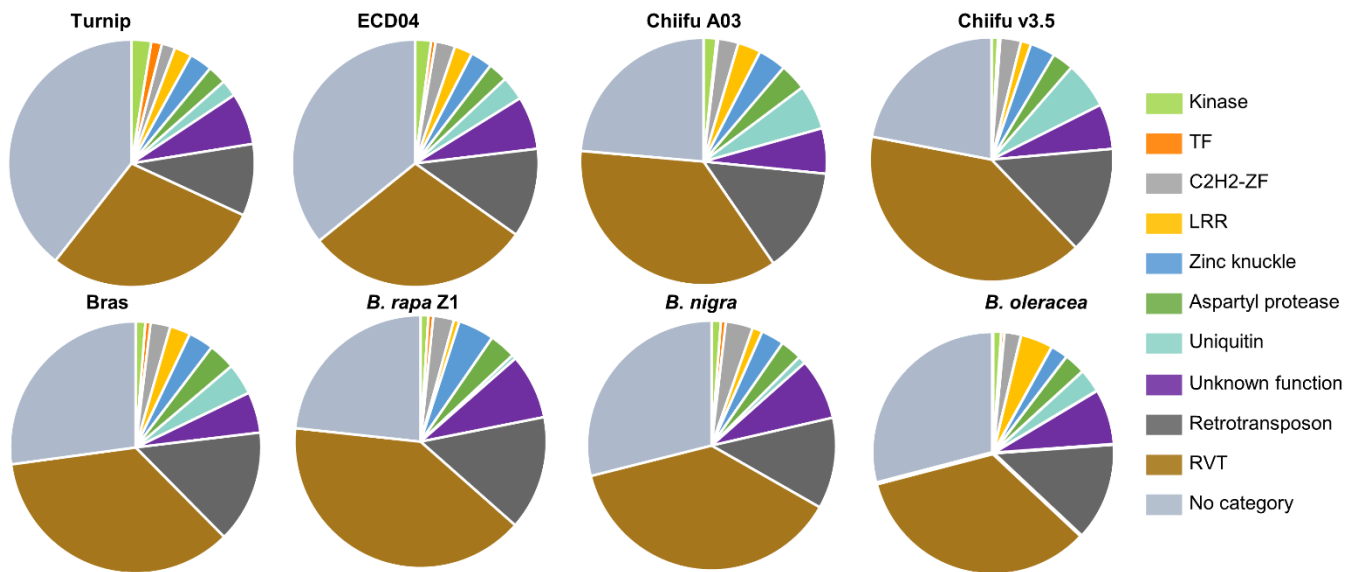

131 **Supplemental Figure 11. Functional annotation of pseudogenes in *Brassica***  
 132 **species/subspecies according to Pfam domains.**

133

134

135

136

137

138

139

140

141

142

143

144

145

146

147

148

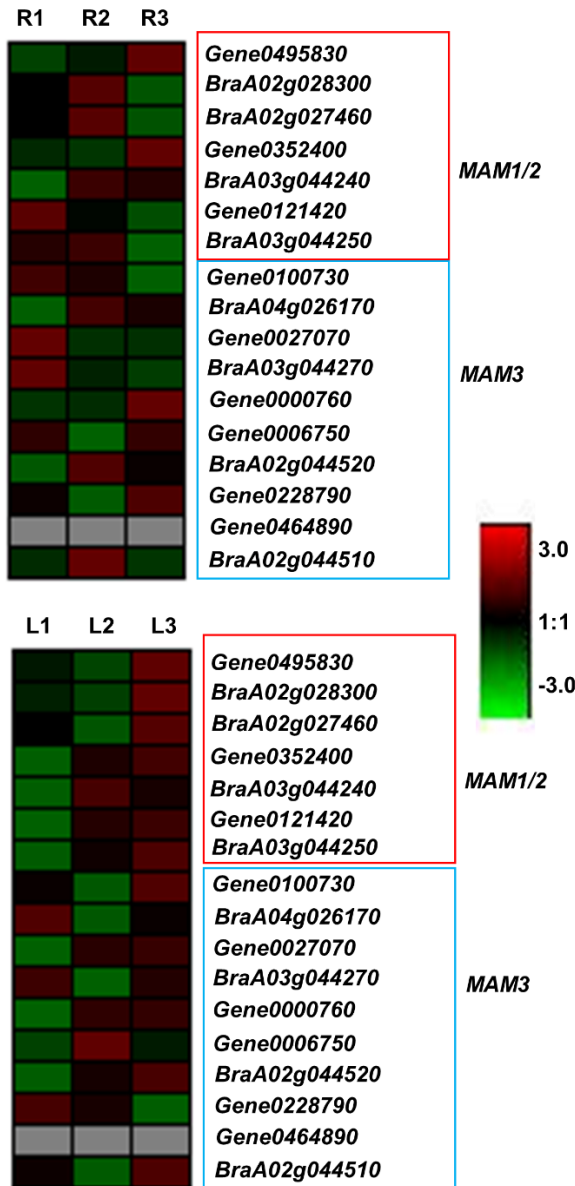

149  
 150  
 151  
 152  
 153  
 154  
 155  
 156  
 157  
 158  
 159

**Supplemental Figure 12. Heat map of the quantitative real-time PCR (qRT-PCR) data for the turnip and Chiifu v3.5 MAM genes in different developmental stages.** The qRT-PCR analysis was completed using three biological and technical replicates. R1, R2, and R3 represent the taproots collected at 10, 20, and 30 days after germination, respectively. L1, L2, and L3 represent the leaves collected at 10, 20, and 30 days after germination, respectively. Gene expression levels are presented in the colored bar. *TUB2* as reference (LOC103873913).

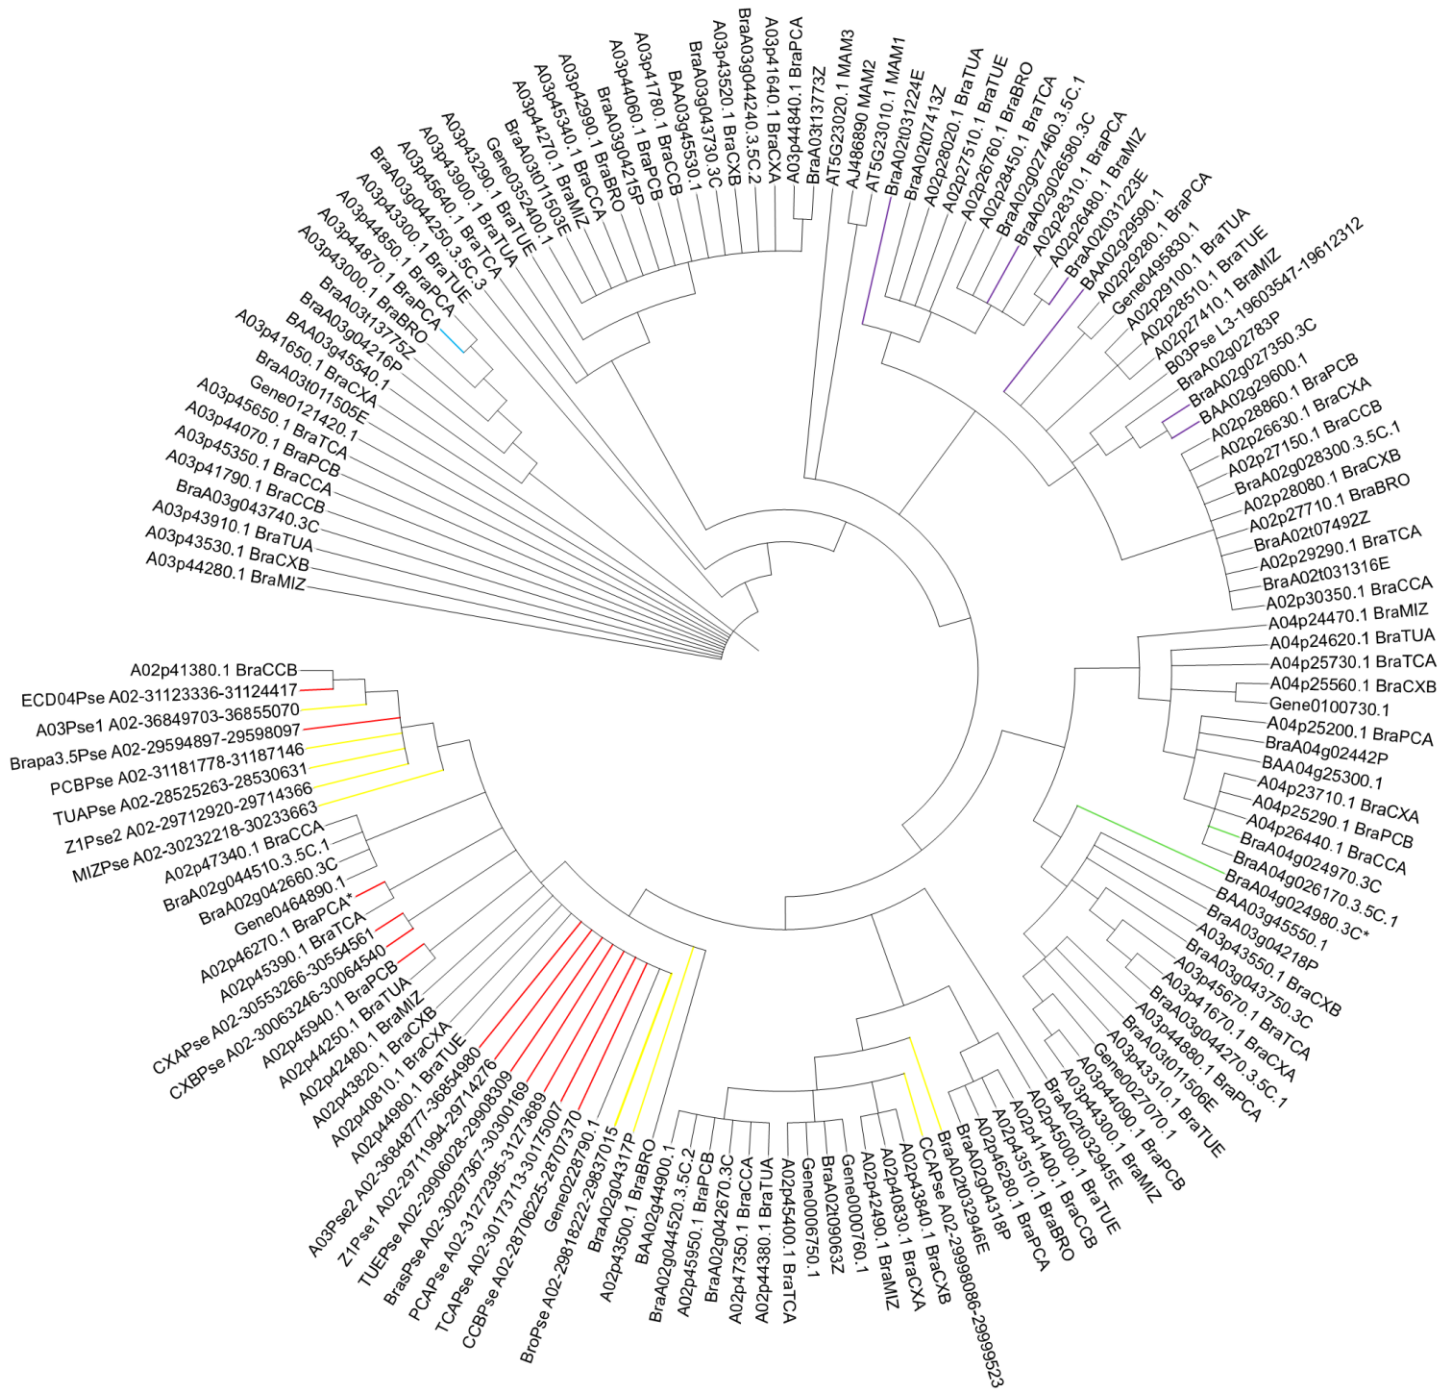

160 **Supplemental Figure 13. Phylogenetic tree comprising *MAM* genes and**  
 161 **pseudogenes.** Neighbor-joining trees consisting of *MAM* genes were constructed by  
 162 aligning coding sequences, with 1,000 bootstrap replicates. The *A. thaliana* genome  
 163 includes only *MAM1* and *MAM3*. Colored lines represent pseudogenes, with numbers  
 164 indicating the position of the pseudogene on the chromosome.

165

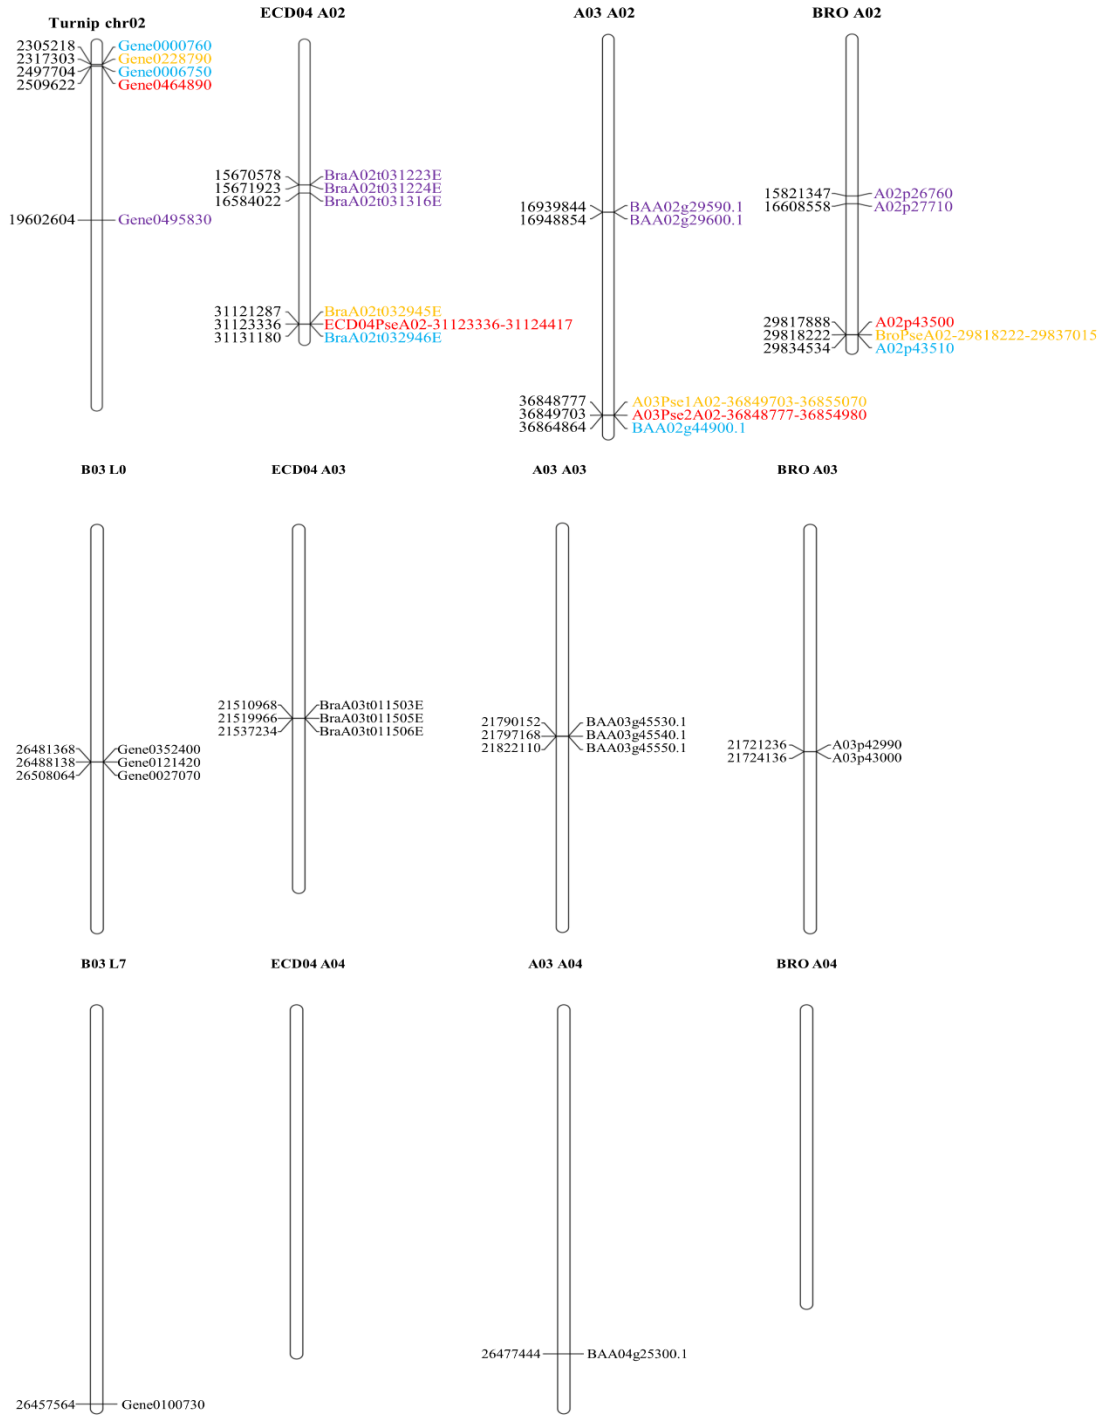

166

167 **Supplemental Figure 14. Distribution of *MAM* genes on the turnip, ECD04, Chiifu**  
 168 **A03, and BRO chromosomes.** Turnip has the most *MAM* functional genes, which are  
 169 distributed on chromosomes chr02, chr03, and chr04; the collinear chromosomes in  
 170 other species/subspecies are A02, A03, and A04, respectively. Identical colors represent  
 171 the same homologous regions on turnip chr02 and ECD04, Chiifu A03, and BRO A02  
 172 chromosomes.



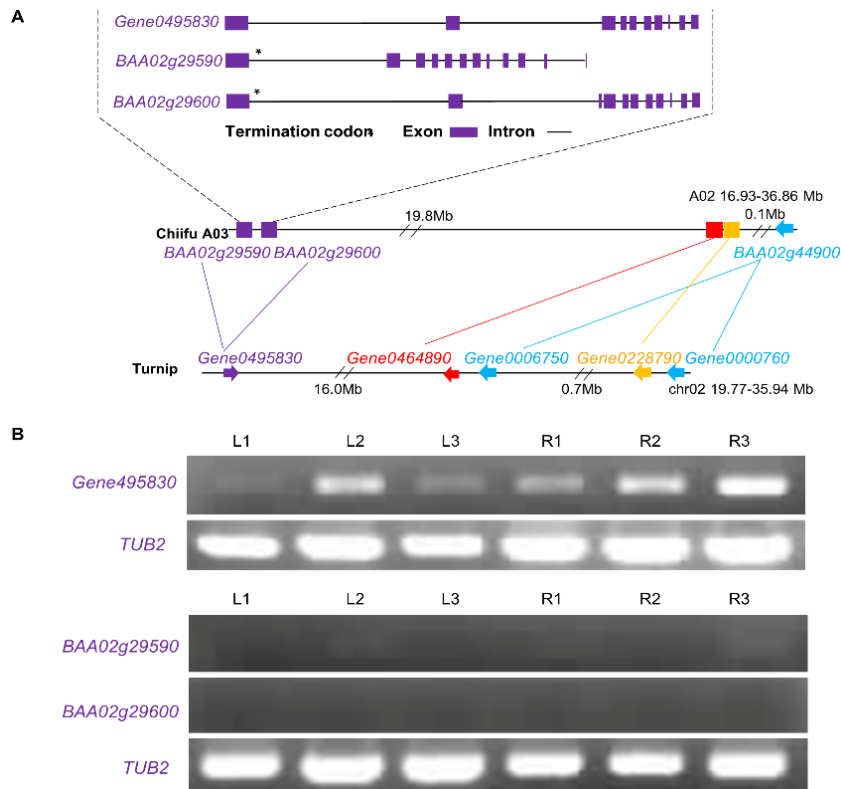

173

174 **Supplemental Figure 15. Identification of pseudogenes.**

175 (A) Analysis of the synteny among *MAM* genes in turnip and Chiifu A03. Turnip  
 176 chromosome chr02 with *MAM* genes and the collinear chromosome A02 in Chiifu A03  
 177 are presented. Identical colors represent the same homologous region. Lines indicate  
 178 genes with colinearity. Arrows indicate the gene orientation on the chromosome.  
 179 Boxes represent pseudogenes in Chiifu A03. Specifically, dashed box represents *MAM*  
 180 (*Gene0495830*) in turnip converted into pseudogenes (*BAA02g29590* and  
 181 *BAA02g29600*) due to codon termination (asterisks) in Chiifu A03. Syntenic regions in  
 182 both genomes, with one turnip genome containing two functional gene (*Gene0464890*  
 183 and *Gene0228790*) and others containing homologous sequence in Chiifu A03 genome  
 184 with clear markers indicative of a pseudogene, are presented.

185 (B) Validation of pseudogenes. The expression levels of pseudogenes *BAA02g29590*  
 186 and *BAA02g29600* in Chiifu at different developmental stages (L1–L3 in leaves and  
 187 R1–R3 in taproots) were compared with the expression levels of the functional gene  
 188 *Gene0495830* in turnip via semi-quantitative PCR (RT-PCR). L1, L2, and L3 and R1,  
 189 R2, and R3 represent the leaf samples and taproot samples collected at 10, 20, and 30  
 190 days after germination, respectively. *ACT* as reference.

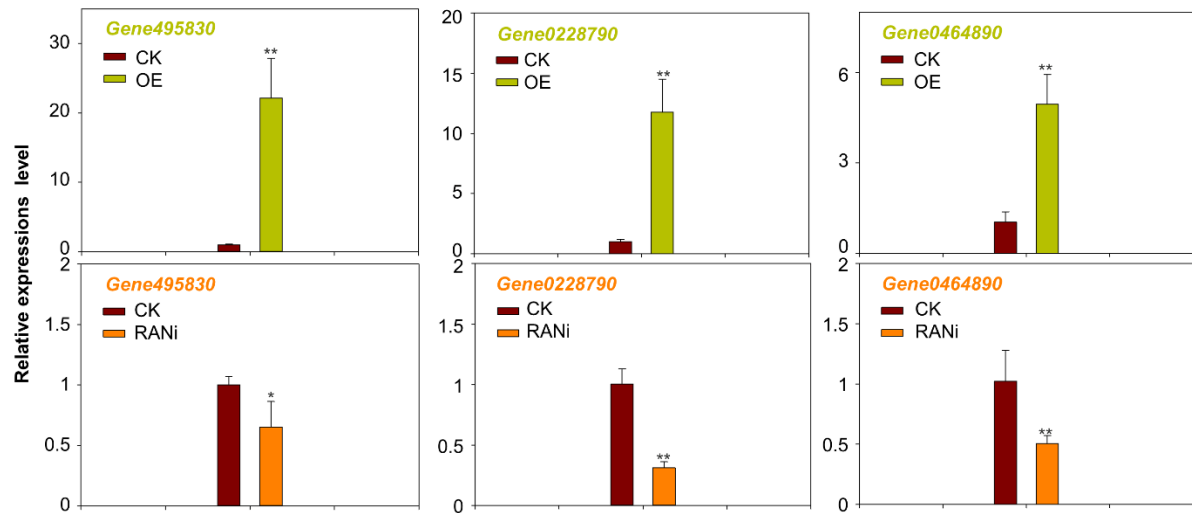

191

192 **Supplemental Figure 16. Overexpression (OE) of three turnip *MAM* functional**

193 **genes in Chiifu hairy roots (top) and silencing of these genes in turnip hairy roots**

194 **via RNAi (bottom). Non-transgenic roots served as the control (CK). The analysis was**

195 **completed using three biological and technical replicates. Error bars indicate the**

196 **standard deviation. The *MAM* genes with significant differences in expression between**

197 **the transgenic and CK samples are indicated by asterisks (\*,  $P < 0.05$ ; \*\*,  $P < 0.01$ ).**

198 *TUB2* as reference (LOC103873913).

199

200

201

202

203

204

205

206

207

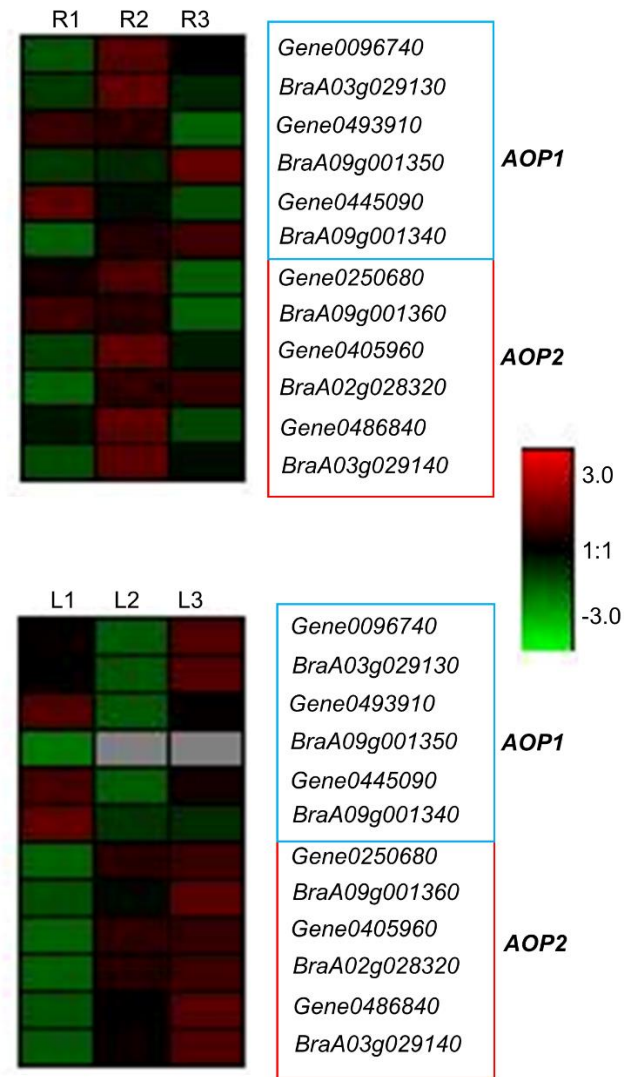

208

209 **Supplemental Figure 17. Heat map of the quantitative real-time PCR (qRT-PCR)**

210 **data for the turnip and Chiifu v3.5 AOP gene expression levels at different**

211 **developmental stages.** The qRT-PCR analysis was completed using three biological

212 and technical replicates. R1, R2, and R3 represent the taproot samples collected at 10,

213 20, and 30 days after germination, respectively. L1, L2, and L3 represent the leaf

214 samples collected at 10, 20, and 30 days after germination, respectively. Gene

215 expression levels are presented in the colored bar. *TUB2* as reference (LOC103873913).

216

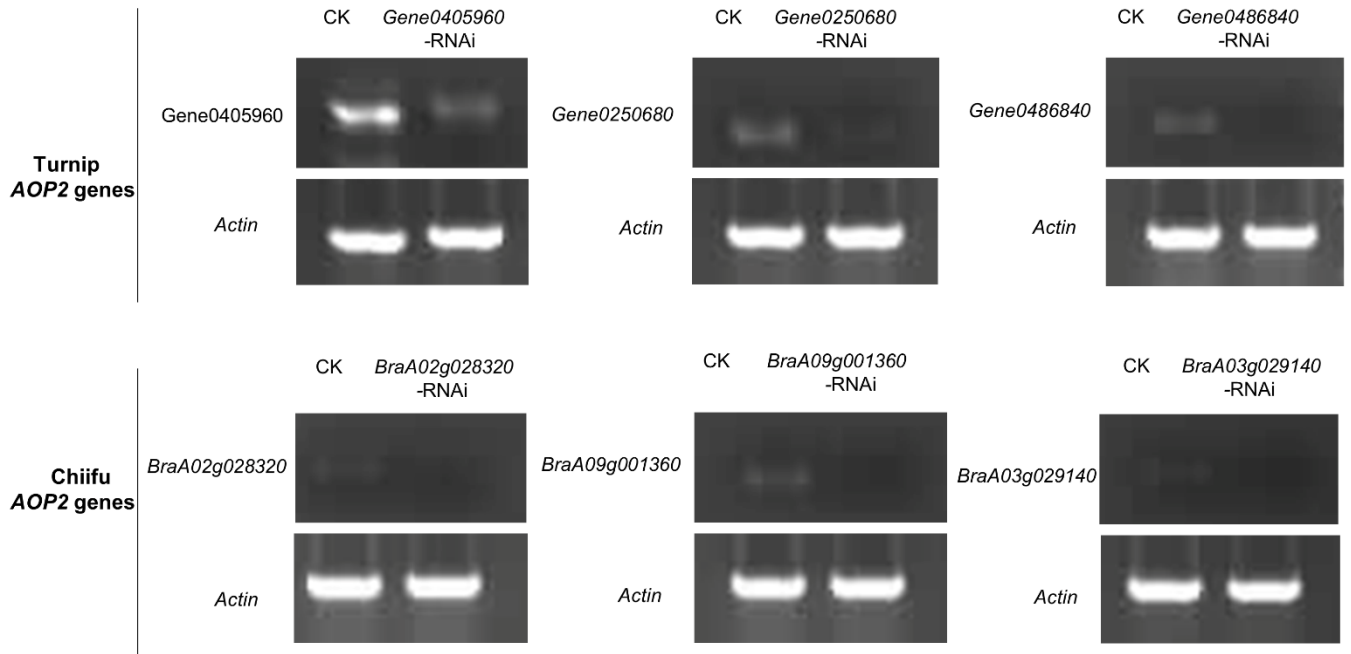

217 **Supplemental Figure 18. Results of the RT-PCR analysis of *AOP2* genes in turnip**

218 **and Chiifu v3.5. *AOP2*-RNAi and control samples were analyzed. *Actin* as reference.**

219

220

221

222

223

224

225

226

227

228

229

230

231

232

233

234

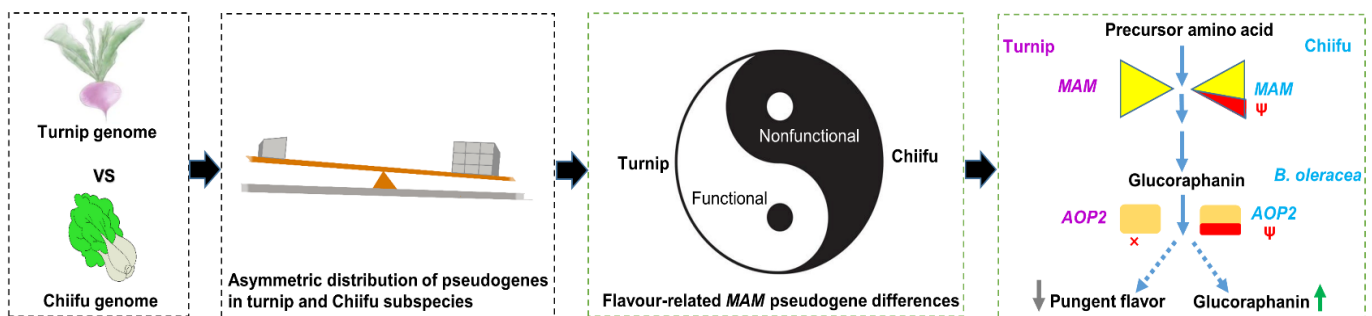

235 **Supplemental Figure 19. Article flowchart.** The pseudogenetic differences in turnip  
 236 and Chiifu genomes resulted in the differential evolution of the flavor-related GSL  
 237 metabolic pathway. Pseudogenes were distributed asymmetrically on the chromosomes  
 238 in these two subspecies. The *MAM* gene family expanded in turnip but converted into  
 239 pseudogenes in Chiifu. There are three functional *AOP2* genes both in turnip and *B.*  
 240 *rapa*. Although *B. oleracea* also contains three *AOP2* genes, only one is functional; the  
 241 other two genes are mutated. These differences explain the diversity in the flavors of  
 242 turnip and Chiifu. In turnip, the accumulation of anticancer substances may be  
 243 enhanced and the pungency may be decreased by the RNAi-based silencing of the  
 244 flavor- and anticancer-associated *AOP2* gene in the GSL pathway. Pseudogenes are  
 245 indicated by “ $\psi$ ”.

246

247

248

249

250

251

252

253

254

255

256

257

258

Supplemental tables

259  
260  
261  
262  
263  
264  
265  
266  
267  
268  
269  
270  
271  
272  
273  
274  
275  
276  
277  
278  
279  
280  
281  
282  
283

**Supplemental Table 1. Estimation of the turnip genome size according to a k-mer analysis.**

| <b>K-mer</b> | <b>K-mer number</b> | <b>K-mer depth</b> | <b>Genome size (Mb)</b> |
|--------------|---------------------|--------------------|-------------------------|
| 19           | 45,695,255,046      | 14                 | 446.09                  |

284 **Supplemental Table 2. Sequencing data for the turnip genome assembly.**

| <b>Sequencing libraries</b> | <b>Illumina reads</b> | <b>Pacbio reads</b> | <b>Hi-C reads</b> |
|-----------------------------|-----------------------|---------------------|-------------------|
| Insert size (bp)            | 270                   | 20 000              | 270               |
| Clean data (Gb)             | 59.4                  | 44.93               | 26.79             |
| Mean read length (bp)       | -                     | 8,595               | -                 |
| Sequence coverage (×)       | 50                    | 110                 | 65.5              |

285

286

287

288

289

290

291

292

293

294

295

296

297

298

299

300

301

302

303

304

305 **Supplemental Table 3. Reads mapped to the turnip genome assembly.**

---

| <b>Library</b> | <b>Total reads</b> | <b>Mapped reads</b> | <b>Mapped (%)</b> |
|----------------|--------------------|---------------------|-------------------|
| 270 bp         | 226,529,887        | 219,034,986         | 96.69             |

---

306

307

308

309

310

311

312

313

314

315

316

317

318

319

320

321

322

323

324

325

326

327

328

329



330 **Supplemental Table 4. BUSCO results for the turnip genome assembly.**

| <b>Complete BUSCOs</b> | <b>Complete and single-copy BUSCOs</b> | <b>Complete and duplicated BUSCOs</b> | <b>Fragmented BUSCOs</b> | <b>Missing BUSCOs</b> |
|------------------------|----------------------------------------|---------------------------------------|--------------------------|-----------------------|
| 1,568 (97.20%)         | 1065 (66.00%)                          | 503 (31.20%)                          | 7 (0.40%)                | 39 (2.40%)            |

331

332

333

334

335

336

337

338

339

340

341

342

343

344

345

346

347

348 **Supplemental Table 5. Hi-C sequencing data statistics.**

---

| <b>Read Pairs Number</b> | <b>Base Number</b> | <b>GC Content (%)</b> | <b>% <math>\geq</math>Q30</b> |
|--------------------------|--------------------|-----------------------|-------------------------------|
| 89,707,160               | 26,796,366,884     | 40.46                 | 92.39                         |

---

349

350

351

352

353

354

355

356

357

358

359

360

361

362

363

364

365

366

367

368 **Supplemental Table 6. Evaluation of the coverage on the basis of mapped clean**  
369 **reads.**

| <b>Mapping Type</b>      | <b>Number</b> | <b>Ratio (%)</b> |
|--------------------------|---------------|------------------|
| Total Read Pairs         | 89,707,160    | 100              |
| Mapped Reads             | 153,017,543   | 85.28            |
| Unique Mapped Read Pairs | 19,744,769    | 22.01            |

370

371

372

373

374

375

376

377

378

379

380

381

382

383

384

385

386 **Supplemental Table 7. Chromosome length data statistics.**

| <b>Group</b> | <b>Sequence Length (bp)</b> |
|--------------|-----------------------------|
| chr01        | 37215573                    |
| chr02        | 38061388                    |
| chr03        | 38969619                    |
| chr04        | 26283953                    |
| chr05        | 34184301                    |
| chr06        | 42502065                    |
| chr07        | 30802089                    |
| chr08        | 27475427                    |
| chr09        | 57405788                    |
| Chr10        | 23028969                    |

387

388

389

390

391

392

393

394

395

396 **Supplemental Table 8. Summary of the transposable elements in the turnip,**  
 397 **ECD04, and Chiifu A03 genomes.**

| Species | class    | Subclass      | Copy   |             | % Genome |
|---------|----------|---------------|--------|-------------|----------|
|         |          |               | Number | Length (bp) |          |
| A03     | classI   | LTR/Copia     | 22050  | 20087298    | 5.56     |
|         |          | LTR/Gypsy     | 35435  | 37614783    | 10.41    |
|         |          | LTR/unkonwn   | 31179  | 13195197    | 3.65     |
|         | classII  | CACTA         | 10046  | 5289144     | 1.46     |
|         |          | Mutator       | 51177  | 31478394    | 8.71     |
|         |          | PIF_Harbinger | 9328   | 3677627     | 1.02     |
|         |          | Tc1_Mariner   | 3624   | 1009162     | 0.28     |
|         |          | hAT           | 13346  | 4372430     | 1.21     |
|         | classIII | helitron      | 127160 | 49668898    | 13.74    |
|         | others   | -             | 48403  | 15461914    | 4.27     |
|         | total    | -             | 351748 | 181854847   | 50.31    |
| Turnip  | classI   | LTR/Copia     | 18379  | 14963893    | 4.21     |
|         |          | LTR/Gypsy     | 32017  | 30291604    | 8.51     |
|         |          | LTR/unkonwn   | 26760  | 15674789    | 4.41     |
|         | classII  | CACTA         | 11923  | 6775596     | 1.90     |
|         |          | Mutator       | 22949  | 12410888    | 3.49     |
|         |          | PIF_Harbinger | 11872  | 4237219     | 1.19     |
|         |          | Tc1_Mariner   | 5058   | 1308878     | 0.37     |
|         |          | hAT           | 13454  | 4530589     | 1.27     |
|         | classIII | helitron      | 110792 | 48125049    | 13.53    |
|         | others   | -             | 31951  | 13248625    | 3.72     |
|         | total    | -             | 285155 | 151567130   | 42.60    |
| ECD04   | classI   | LTR/Copia     | 24172  | 21758690    | 6.27     |
|         |          | LTR/Gypsy     | 46055  | 35901048    | 10.35    |
|         |          | LTR/unkonwn   | 22666  | 14390627    | 4.15     |
|         | classII  | CACTA         | 10731  | 5942413     | 1.71     |
|         |          | Mutator       | 32738  | 23415477    | 6.75     |
|         |          | PIF_Harbinger | 9486   | 3689151     | 1.06     |
|         |          | Tc1_Mariner   | 3556   | 1109901     | 0.32     |
|         |          | hAT           | 15925  | 4825756     | 1.39     |
|         | classIII | helitron      | 99347  | 37286850    | 10.75    |
|         | others   | -             | 32786  | 14347884    | 4.15     |
|         | total    | -             | 297462 | 162667797   | 46.90    |

398

399

400

401 **Supplemental Table 9. Functional annotations of turnip genes.**

| <b>database</b> | <b>Annotated number</b> | <b>Percentage (%)</b> |
|-----------------|-------------------------|-----------------------|
| eggNOG          | 51069                   | 89.86                 |
| GO              | 25322                   | 44.56                 |
| KEGG_ko         | 23848                   | 41.96                 |
| PFAM            | 34724                   | 61.10                 |
| Swiss-Prot      | 38236                   | 67.28                 |
| NR              | 56018                   | 98.57                 |
| All_Annotated   | 56832                   |                       |

402

403

404

405

406

407

408

409

410

411

412

413

414

415 **Supplemental Table 10. miRNA data statistics.**

| <b>Types</b> | <b>Number</b> |
|--------------|---------------|
| miRNA        | 326           |
| rRNA         | 2010          |
| tRNA         | 1174          |

416  
417  
418  
419  
420  
421  
422  
423  
424  
425  
426  
427  
428  
429  
430  
431  
432  
433  
434  
435  
436  
437  
438  
439  
440  
441  
442  
443  
444  
445  
446  
447  
448  
449  
450

451 **Supplemental Table 11. Statistics of the turnip Illumina paired-end reads (NGS)**  
 452 **and turnip 48A resequencing reads mapped on the new turnip chromosomes.**

| NGS/resequencing reads | Data sources                 | Average sequencing depth | Mapping rate (%) | Coverage (%) |
|------------------------|------------------------------|--------------------------|------------------|--------------|
| Turnip NGS-D01         | This study                   | 70.21                    | 96.79            | 94.78        |
| Turnip NGS-D02         |                              | 54.82                    | 96.50            | 94.61        |
| ECD04 NGS              | NCBI project:<br>PRJNA672906 | 58.31                    | 97.30            | 86.94        |
| TUA NGS                | GSA number:<br>CRA003187     | 23.44                    | 96.47            | 84.50        |
| TUE NGS                |                              | 76.42                    | 96.63            | 86.41        |
| B48Aresseq-1           | (Yang et al.,<br>2019)       | 27.81                    | 96.87            | 92.23        |
| B48Aresseq-2           |                              | 21.44                    | 97.41            | 90.27        |
| B48Aresseq-3           |                              | 25.11                    | 97.42            | 90.28        |

453  
 454  
 455  
 456  
 457  
 458  
 459  
 460  
 461  
 462  
 463  
 464  
 465  
 466  
 467  
 468  
 469  
 470  
 471  
 472



473 **Supplemental Table 12. Statistics of the turnip Illumina paired-end reads (NGS)**  
 474 **and turnip 48A resequencing reads mapped on A03 chromosomes.**

| NGS/resequencing reads | Accession number    | Average sequencing depth | Mapping rate (%) | Coverage (%) |
|------------------------|---------------------|--------------------------|------------------|--------------|
| Turnip NGS-D01         | This study          | 68.27                    | 97.27            | 93.50        |
| Turnip NGS-D02         |                     | 53.33                    | 97.06            | 93.08        |
| B48Aresseq-1           | (Yang et al., 2019) | 26.84                    | 97.42            | 91.73        |
| B48Aresseq-2           |                     | 20.65                    | 98.31            | 89.29        |
| B48Aresseq-3           |                     | 23.52                    | 98.56            | 89.19        |

475  
 476  
 477  
 478  
 479  
 480  
 481  
 482  
 483  
 484  
 485  
 486  
 487  
 488  
 489  
 490  
 491  
 492  
 493  
 494  
 495  
 496  
 497  
 498  
 499  
 500  
 501  
 502  
 503  
 504  
 505  
 506  
 507

508 **Supplemental Table 13. Statistics of the turnip Illumina paired-end reads (NGS)**  
 509 **and turnip 48A resequencing reads mapped on ECD04 chromosomes.**

| NGS/resequencing reads | Accession number    | Average sequencing depth | Mapping rate (%) | Coverage (%) |
|------------------------|---------------------|--------------------------|------------------|--------------|
| Turnip NGS-D01         | This study          | 88.17                    | 97.00            | 93.41        |
| Turnip NGS-D02         |                     | 69.33                    | 96.78            | 93.16        |
| B48Aresseq-1           | (Yang et al., 2019) | 34.83                    | 97.24            | 92.76        |
| B48Aresseq-2           |                     | 27.50                    | 98.12            | 91.87        |
| B48Aresseq-3           |                     | 32.59                    | 98.42            | 91.90        |

510  
 511  
 512  
 513  
 514  
 515  
 516  
 517  
 518  
 519  
 520  
 521  
 522  
 523  
 524  
 525  
 526  
 527  
 528  
 529  
 530  
 531  
 532  
 533  
 534  
 535  
 536  
 537  
 538  
 539  
 540  
 541  
 542

543 **Supplemental Table 14. Statistics of the turnip Illumina paired-end reads (NGS)**  
 544 **and turnip 48A resequencing reads mapped on TUA chromosomes.**

| NGS/resequencing reads | Accession number | Average sequencing depth | Mapping rate (%) | Coverage (%) |
|------------------------|------------------|--------------------------|------------------|--------------|
| Turnip NGS-D01         | This study       | 64.99                    | 97.25            | 94.77        |
| Turnip NGS-D02         |                  | 50.72                    | 97.03            | 94.60        |
| B48Aresseq-1           | (Yang et         | 25.72                    | 97.41            | 94.40        |
| B48Aresseq-2           | al., 2019)       | 19.42                    | 98.30            | 93.63        |
| B48Aresseq-3           |                  | 22.21                    | 98.56            | 93.11        |

545  
 546  
 547  
 548  
 549  
 550  
 551  
 552  
 553  
 554  
 555  
 556  
 557  
 558  
 559  
 560  
 561  
 562  
 563  
 564  
 565  
 566  
 567  
 568  
 569  
 570  
 571  
 572  
 573  
 574  
 575  
 576  
 577

578 **Supplemental Table 15. Statistics of the turnip Illumina paired-end reads (NGS)**  
 579 **and turnip 48A resequencing reads mapped on TUE chromosomes.**

| NGS/resequencing reads | Accession number | Average sequencing depth | Mapping rate (%) | Coverage (%) |
|------------------------|------------------|--------------------------|------------------|--------------|
| Turnip NGS-D01         | This study       | 67.49                    | 96.76            | 94.64        |
| Turnip NGS-D02         |                  | 52.68                    | 96.54            | 94.47        |
| B48Aresseq-1           | (Yang et al.,    | 26.55                    | 96.34            | 93.95        |
| B48Aresseq-2           | 2019)            | 20.18                    | 97.92            | 93.61        |
| B48Aresseq-3           |                  | 23.14                    | 98.19            | 93.10        |

580  
 581  
 582  
 583  
 584  
 585  
 586  
 587  
 588  
 589  
 590  
 591  
 592  
 593  
 594  
 595  
 596  
 597  
 598  
 599  
 600  
 601  
 602  
 603  
 604  
 605  
 606  
 607  
 608  
 609  
 610  
 611  
 612  
 613

614 **Supplemental Table 16. Statistical analysis of the retained genes in three**  
615 **subgenomic blocks in Chiifu A03 and turnip.**

| <i>A. thaliana</i> |              | No. of A03 genes |      |      |       |      |       | No. of Turnip genes |      |      |       |      |       |
|--------------------|--------------|------------------|------|------|-------|------|-------|---------------------|------|------|-------|------|-------|
| Block              | No. of genes | LF               | LF-R | MF1  | MF1-R | MF2  | MF2-R | LF                  | LF-R | MF1  | MF1-R | MF2  | MF2-R |
| A                  | 1902         | 751              | 0.39 | 748  | 0.39  | 623  | 0.33  | 815                 | 0.43 | 570  | 0.30  | 400  | 0.21  |
| B                  | 1539         | 582              | 0.38 | 442  | 0.29  | 428  | 0.28  | 643                 | 0.42 | 477  | 0.31  | 412  | 0.27  |
| C                  | 1081         | 334              | 0.31 | 325  | 0.30  | 290  | 0.27  | 412                 | 0.38 | 319  | 0.30  | 132  | 0.12  |
| D                  | 586          | 278              | 0.47 | 121  | 0.21  | 43   | 0.07  | 298                 | 0.51 | 134  | 0.23  | 20   | 0.03  |
| E                  | 1610         | 1315             | 0.82 | 542  | 0.34  | 114  | 0.07  | 1351                | 0.84 | 562  | 0.35  | 67   | 0.04  |
| F                  | 2691         | 1365             | 0.51 | 985  | 0.37  | 833  | 0.31  | 1435                | 0.53 | 1012 | 0.38  | 903  | 0.34  |
| G                  | 186          | 19               | 0.10 | 19   | 0.10  | 15   | 0.08  | 16                  | 0.09 | 14   | 0.08  | 0    | 0.00  |
| H                  | 557          | 251              | 0.45 | 190  | 0.34  | 79   | 0.14  | 239                 | 0.43 | 185  | 0.33  | 84   | 0.15  |
| I                  | 811          | 331              | 0.41 | 228  | 0.28  | 91   | 0.11  | 381                 | 0.47 | 109  | 0.13  | 100  | 0.12  |
| J                  | 1797         | 925              | 0.51 | 777  | 0.43  | 589  | 0.33  | 950                 | 0.53 | 820  | 0.46  | 627  | 0.35  |
| K                  | 255          | 115              | 0.45 | 91   | 0.36  | 69   | 0.27  | 127                 | 0.50 | 104  | 0.41  | 73   | 0.29  |
| L                  | 439          | 189              | 0.43 | 124  | 0.28  | 98   | 0.22  | 229                 | 0.52 | 94   | 0.21  | 22   | 0.05  |
| M                  | 666          | 319              | 0.48 | 95   | 0.14  | 41   | 0.06  | 356                 | 0.53 | 97   | 0.15  | 47   | 0.07  |
| N                  | 1240         | 690              | 0.56 | 468  | 0.38  | 335  | 0.27  | 692                 | 0.56 | 402  | 0.32  | 324  | 0.26  |
| O                  | 518          | 254              | 0.49 | 162  | 0.31  | 74   | 0.14  | 261                 | 0.50 | 188  | 0.36  | 70   | 0.14  |
| P                  | 357          | 133              | 0.37 | 88   | 0.25  | 44   | 0.12  | 135                 | 0.38 | 97   | 0.27  | 55   | 0.15  |
| Q                  | 602          | 267              | 0.44 | 164  | 0.27  | 149  | 0.25  | 280                 | 0.47 | 189  | 0.31  | 156  | 0.26  |
| R                  | 2060         | 1175             | 0.57 | 783  | 0.38  | 752  | 0.37  | 1166                | 0.57 | 761  | 0.37  | 745  | 0.36  |
| S                  | 731          | 268              | 0.37 | 103  | 0.14  | 45   | 0.06  | 331                 | 0.45 | 101  | 0.14  | 38   | 0.05  |
| T                  | 415          | 108              | 0.26 | 97   | 0.23  | 60   | 0.14  | 123                 | 0.30 | 109  | 0.26  | 84   | 0.20  |
| U                  | 2477         | 1445             | 0.58 | 877  | 0.35  | 657  | 0.27  | 1421                | 0.57 | 912  | 0.37  | 666  | 0.27  |
| V                  | 620          | 284              | 0.46 | 186  | 0.30  | 176  | 0.28  | 357                 | 0.58 | 212  | 0.34  | 193  | 0.31  |
| W                  | 1180         | 547              | 0.46 | 432  | 0.37  | 397  | 0.34  | 536                 | 0.45 | 503  | 0.43  | 394  | 0.33  |
| X                  | 734          | 290              | 0.40 | 249  | 0.34  | 205  | 0.28  | 360                 | 0.49 | 240  | 0.33  | 236  | 0.32  |
| Total              | 25054        | 12235            |      | 8296 |       | 6207 |       | 12914               |      | 8211 |       | 5848 |       |

616 Note: The LF (least fractionated), MF1 (medium fractionated), and MF2 (most  
617 fractionated) subgenomes of Chiifu A03 and turnip were obtained on the basis of the  
618 homology with *A. thaliana* blocks. The retention rates were calculated as the proportion  
619 of the genes in each subgenomic block that had a corresponding gene in *A. thaliana*  
620 blocks. R, retention rate.

621

622

**Supplemental Table 17. MAM genes and pseudogenes in *Brassica* genomes**

| Gene ID                     | Species                          | Chr   | Start    | End      |
|-----------------------------|----------------------------------|-------|----------|----------|
| <i>AT5G23010.1</i>          | <i>A. thaliana</i>               | Chr5  | 7702848  | 7707172  |
| <i>AJ486890</i>             | <i>A. thaliana</i>               | Chr5  |          |          |
| <i>AT5G23020.1</i>          | <i>A. thaliana</i>               | Chr5  | 7718118  | 7721866  |
| <i>BAA02g29590.1</i>        | <i>Brassica rapa</i> Chiifu A03  | A02   | 16939844 | 16941344 |
| <i>BAA02g29600.1</i>        | <i>Brassica rapa</i> Chiifu A03  | A02   | 16948854 | 16949309 |
| <i>BAA02g44900.1</i>        | <i>Brassica rapa</i> Chiifu A03  | A02   | 36864864 | 36869292 |
| <i>BAA03g45530.1</i>        | <i>Brassica rapa</i> Chiifu A03  | A03   | 21790151 | 21792578 |
| <i>BAA03g45540.1</i>        | <i>Brassica rapa</i> Chiifu A03  | A03   | 21797168 | 21802282 |
| <i>BAA03g45550.1</i>        | <i>Brassica rapa</i> Chiifu A03  | A03   | 21822110 | 21824526 |
| <i>BAA04g25300.1</i>        | <i>Brassica rapa</i> Chiifu A03  | A04   | 26477444 | 26480189 |
| <i>Gene0352400.1</i>        | Turnip B03                       | chr03 | 26481369 | 26483548 |
| <i>Gene0121420.1</i>        | Turnip B03                       | chr02 | 2497704  | 2501665  |
| <i>Gene0027070.1</i>        | Turnip B03                       | chr03 | 26508063 | 26510950 |
| <i>Gene0000760.1</i>        | Turnip B03                       | chr02 | 2305218  | 2309166  |
| <i>Gene0228790.1</i>        | Turnip B03                       | chr02 | 2317303  | 2318748  |
| <i>Gene0006750.1</i>        | Turnip B03                       | chr02 | 2497704  | 2501665  |
| <i>Gene0464890.1</i>        | Turnip B03                       | chr02 | 2509622  | 2512810  |
| <i>Gene0495830.1</i>        | Turnip B03                       | chr02 | 19602605 | 19612312 |
| <i>Gene0100730.1</i>        | Turnip B03                       | chr04 | 26457563 | 26460316 |
| <i>BraA02g027460.3.5C.1</i> | <i>Brassica rapa</i> Chiifu v3.5 | A02   | 15960475 | 15974715 |
| <i>BraA02g028300.3.5C.1</i> | <i>Brassica rapa</i> Chiifu v3.5 | A02   | 16660024 | 16669763 |
| <i>BraA02g044510.3.5C.1</i> | <i>Brassica rapa</i> Chiifu v3.5 | A02   | 29594897 | 29598097 |
| <i>BraA02g044520.3.5C.2</i> | <i>Brassica rapa</i> Chiifu v3.5 | A02   | 29607024 | 29611499 |
| <i>BraA03g044240.3.5C.2</i> | <i>Brassica rapa</i> Chiifu v3.5 | A03   | 22082460 | 22085246 |
| <i>BraA03g044250.3.5C.3</i> | <i>Brassica rapa</i> Chiifu v3.5 | A03   | 22088206 | 22094550 |
| <i>BraA03g044270.3.5C.1</i> | <i>Brassica rapa</i> Chiifu v3.5 | A03   | 22114597 | 22117013 |
| <i>BraA04g026170.3.5C.1</i> | <i>Brassica rapa</i> Chiifu v3.5 | A04   | 18013584 | 18016329 |
| <i>BraA02g026580.3C</i>     | <i>Brassica rapa</i> Chiifu v3.0 | A02   | 15960475 | 15960927 |
| <i>BraA02g027350.3C</i>     | <i>Brassica rapa</i> Chiifu v3.0 | A02   | 16669308 | 16669763 |
| <i>BraA02g042660.3C</i>     | <i>Brassica rapa</i> Chiifu v3.0 | A02   | 29594897 | 29598097 |
| <i>BraA02g042670.3C</i>     | <i>Brassica rapa</i> Chiifu v3.0 | A02   | 29607154 | 29611410 |
| <i>BraA03g043730.3C</i>     | <i>Brassica rapa</i> Chiifu v3.0 | A03   | 22082638 | 22085062 |
| <i>BraA03g043740.3C</i>     | <i>Brassica rapa</i> Chiifu v3.0 | A03   | 22089652 | 22094767 |
| <i>BraA03g043750.3C</i>     | <i>Brassica rapa</i> Chiifu v3.0 | A03   | 22114597 | 22117013 |
| <i>BraA04g024970.3C</i>     | <i>Brassica rapa</i> Chiifu v3.0 | A04   | 18013584 | 18015367 |
| <i>BraA04g024980.3C</i>     | <i>Brassica rapa</i> Chiifu v3.0 | A04   | 18015386 | 18016329 |
| <i>BraA02g02783P</i>        | <i>Brassica rapa</i> chinensis   | A02   | 17294254 | 17304661 |
| <i>BraA02g04317P</i>        | <i>Brassica rapa</i> chinensis   | A02   | 30297471 | 30300018 |
| <i>BraA02g04318P</i>        | <i>Brassica rapa</i> chinensis   | A02   | 30306808 | 30312436 |
| <i>BraA03g04215P</i>        | <i>Brassica rapa</i> chinensis   | A03   | 21567279 | 21569915 |
| <i>BraA03g04216P</i>        | <i>Brassica rapa</i> chinensis   | A03   | 21572747 | 21579487 |

|                           |                                |     |          |          |
|---------------------------|--------------------------------|-----|----------|----------|
| <i>BraA03g04218P</i>      | <i>Brassica rapa chinensis</i> | A03 | 21598090 | 21600506 |
| <i>BraA04g02442P</i>      | <i>Brassica rapa chinensis</i> | A04 | 18181429 | 18184173 |
| <i>A02p26760.1_BraBRO</i> | <i>Brassica rapa BraBRO</i>    | A02 | 15821348 | 15826813 |
| <i>A02p27710.1_BraBRO</i> | <i>Brassica rapa BraBRO</i>    | A02 | 16608558 | 16618326 |
| <i>A02p43500.1_BraBRO</i> | <i>Brassica rapa BraBRO</i>    | A02 | 29817889 | 29819947 |
| <i>A02p43510.1_BraBRO</i> | <i>Brassica rapa BraBRO</i>    | A02 | 29834535 | 29839175 |
| <i>A03p42990.1_BraBRO</i> | <i>Brassica rapa BraBRO</i>    | A03 | 21721237 | 21723414 |
| <i>A03p43000.1_BraBRO</i> | <i>Brassica rapa BraBRO</i>    | A03 | 21724136 | 21732233 |
| <i>A02p30350.1_BraCCA</i> | <i>Brassica rapa BraCCA</i>    | A02 | 17275036 | 17284774 |
| <i>A02p47340.1_BraCCA</i> | <i>Brassica rapa BraCCA</i>    | A02 | 29985801 | 29989001 |
| <i>A02p47350.1_BraCCA</i> | <i>Brassica rapa BraCCA</i>    | A02 | 29997052 | 30001319 |
| <i>A03p45340.1_BraCCA</i> | <i>Brassica rapa BraCCA</i>    | A03 | 21954602 | 21956781 |
| <i>A03p45350.1_BraCCA</i> | <i>Brassica rapa BraCCA</i>    | A03 | 21961371 | 21966485 |
| <i>A04p26440.1_BraCCA</i> | <i>Brassica rapa BraCCA</i>    | A04 | 17458545 | 17461290 |
| <i>A02p27150.1_BraCCB</i> | <i>Brassica rapa BraCCB</i>    | A02 | 16847321 | 16857387 |
| <i>A02p41380.1_BraCCB</i> | <i>Brassica rapa BraCCB</i>    | A02 | 28707728 | 28710330 |
| <i>A02p41400.1_BraCCB</i> | <i>Brassica rapa BraCCB</i>    | A02 | 28717453 | 28722350 |
| <i>A03p41780.1_BraCCB</i> | <i>Brassica rapa BraCCB</i>    | A03 | 21576924 | 21579457 |
| <i>A03p41790.1_BraCCB</i> | <i>Brassica rapa BraCCB</i>    | A03 | 21582421 | 21589194 |
| <i>A02p26630.1_BraCXA</i> | <i>Brassica rapa BraCXA</i>    | A02 | 17062135 | 17071869 |
| <i>A02p40810.1_BraCXA</i> | <i>Brassica rapa BraCXA</i>    | A02 | 30553370 | 30555638 |
| <i>A02p40830.1_BraCXA</i> | <i>Brassica rapa BraCXA</i>    | A02 | 30566276 | 30570419 |
| <i>A03p41640.1_BraCXA</i> | <i>Brassica rapa BraCXA</i>    | A03 | 21664986 | 21667166 |
| <i>A03p41650.1_BraCXA</i> | <i>Brassica rapa BraCXA</i>    | A03 | 21671755 | 21676870 |
| <i>A03p41670.1_BraCXA</i> | <i>Brassica rapa BraCXA</i>    | A03 | 21695528 | 21699269 |
| <i>A04p23710.1_BraCXA</i> | <i>Brassica rapa BraCXA</i>    | A04 | 18315795 | 18318540 |
| <i>A02p28080.1_BraCXB</i> | <i>Brassica rapa BraCXB</i>    | A02 | 16976779 | 16986521 |
| <i>A02p43820.1_BraCXB</i> | <i>Brassica rapa BraCXB</i>    | A02 | 30063350 | 30065376 |
| <i>A02p43840.1_BraCXB</i> | <i>Brassica rapa BraCXB</i>    | A02 | 30076254 | 30080397 |
| <i>A03p43520.1_BraCXB</i> | <i>Brassica rapa BraCXB</i>    | A03 | 21584467 | 21587185 |
| <i>A03p43530.1_BraCXB</i> | <i>Brassica rapa BraCXB</i>    | A03 | 21591499 | 21596614 |
| <i>A03p43550.1_BraCXB</i> | <i>Brassica rapa BraCXB</i>    | A03 | 21615269 | 21617685 |
| <i>A04p25560.1_BraCXB</i> | <i>Brassica rapa BraCXB</i>    | A04 | 19089372 | 19092125 |
| <i>BraA03t011503E</i>     | Turnip ECD04                   | A03 | 21510967 | 21514685 |
| <i>BraA03t011505E</i>     | Turnip ECD04                   | A03 | 21519966 | 21525728 |
| <i>BraA03t011506E</i>     | Turnip ECD04                   | A03 | 21537234 | 21548661 |
| <i>BraA02t031223E</i>     | Turnip ECD04                   | A02 | 15670577 | 15671029 |
| <i>BraA02t031224E</i>     | Turnip ECD04                   | A02 | 15671924 | 15676050 |
| <i>BraA02t031316E</i>     | Turnip ECD04                   | A02 | 16584022 | 16594081 |
| <i>BraA02t032945E</i>     | Turnip ECD04                   | A02 | 31121287 | 31124919 |
| <i>BraA02t032946E</i>     | Turnip ECD04                   | A02 | 31131180 | 31136203 |
| <i>A02p26480.1_BraMIZ</i> | <i>Brassica rapa BraMIZ</i>    | A02 | 16362670 | 16366821 |
| <i>A02p27410.1_BraMIZ</i> | <i>Brassica rapa BraMIZ</i>    | A02 | 17153545 | 17163010 |
| <i>A02p42480.1_BraMIZ</i> | <i>Brassica rapa BraMIZ</i>    | A02 | 30231396 | 30232788 |

|                    |                              |     |          |          |
|--------------------|------------------------------|-----|----------|----------|
| A02p42490.1_BraMIZ | <i>Brassica rapa</i> BraMIZ  | A02 | 30241605 | 30245752 |
| A03p44270.1_BraMIZ | <i>Brassica rapa</i> BraMIZ  | A03 | 22804269 | 22806447 |
| A03p44280.1_BraMIZ | <i>Brassica rapa</i> BraMIZ  | A03 | 22811037 | 22816151 |
| A03p44300.1_BraMIZ | <i>Brassica rapa</i> BraMIZ  | A03 | 22834805 | 22837587 |
| A04p24470.1_BraMIZ | <i>Brassica rapa</i> BraMIZ  | A04 | 18680083 | 18682849 |
| A02p28310.1_BraPCA | <i>Brassica rapa</i> BraPCA  | A02 | 16472482 | 16486716 |
| A02p29280.1_BraPCA | <i>Brassica rapa</i> BraPCA  | A02 | 17220043 | 17229747 |
| A02p46270.1_BraPCA | <i>Brassica rapa</i> BraPCA  | A02 | 31272988 | 31275046 |
| A02p46280.1_BraPCA | <i>Brassica rapa</i> BraPCA  | A02 | 31282613 | 31287255 |
| A03p44840.1_BraPCA | <i>Brassica rapa</i> BraPCA  | A03 | 22000930 | 22005178 |
| A03p44850.1_BraPCA | <i>Brassica rapa</i> BraPCA  | A03 | 22006059 | 22010189 |
| A03p44870.1_BraPCA | <i>Brassica rapa</i> BraPCA  | A03 | 22017369 | 22018235 |
| A03p44880.1_BraPCA | <i>Brassica rapa</i> BraPCA  | A03 | 22030064 | 22032846 |
| A04p25200.1_BraPCA | <i>Brassica rapa</i> BraPCA  | A04 | 17231544 | 17234288 |
| A02p28860.1_BraPCB | <i>Brassica rapa</i> BraPCB  | A02 | 17379174 | 17388890 |
| A02p45940.1_BraPCB | <i>Brassica rapa</i> BraPCB  | A02 | 31180956 | 31182349 |
| A02p45950.1_BraPCB | <i>Brassica rapa</i> BraPCB  | A02 | 31196946 | 31201358 |
| A03p44060.1_BraPCB | <i>Brassica rapa</i> BraPCB  | A03 | 21740960 | 21743139 |
| A03p44070.1_BraPCB | <i>Brassica rapa</i> BraPCB  | A03 | 21747729 | 21752842 |
| A03p44090.1_BraPCB | <i>Brassica rapa</i> BraPCB  | A03 | 21771499 | 21774281 |
| A04p25290.1_BraPCB | <i>Brassica rapa</i> BraPCB  | A04 | 17060073 | 17062817 |
| A02p28450.1_BraTCA | <i>Brassica rapa</i> BraTCA  | A02 | 16458631 | 16472817 |
| A02p29290.1_BraTCA | <i>Brassica rapa</i> BraTCA  | A02 | 17182970 | 17192709 |
| A02p45390.1_BraTCA | <i>Brassica rapa</i> BraTCA  | A02 | 30174306 | 30182525 |
| A02p45400.1_BraTCA | <i>Brassica rapa</i> BraTCA  | A02 | 30185826 | 30189771 |
| A03p45640.1_BraTCA | <i>Brassica rapa</i> BraTCA  | A03 | 22258279 | 22260297 |
| A03p45650.1_BraTCA | <i>Brassica rapa</i> BraTCA  | A03 | 22265046 | 22270159 |
| A03p45670.1_BraTCA | <i>Brassica rapa</i> BraTCA  | A03 | 22288814 | 22291886 |
| A04p25730.1_BraTCA | <i>Brassica rapa</i> BraTCA  | A04 | 18645836 | 18648694 |
| A02p28020.1_BraTUA | <i>Brassica rapa</i> BraTUA  | A02 | 16413113 | 16414673 |
| A02p29100.1_BraTUA | <i>Brassica rapa</i> BraTUA  | A02 | 17355496 | 17364891 |
| A02p44250.1_BraTUA | <i>Brassica rapa</i> BraTUA  | A02 | 28524441 | 28525834 |
| A02p44380.1_BraTUA | <i>Brassica rapa</i> BraTUA  | A02 | 28583045 | 28587450 |
| A03p43900.1_BraTUA | <i>Brassica rapa</i> BraTUA  | A03 | 21650016 | 21652036 |
| A03p43910.1_BraTUA | <i>Brassica rapa</i> BraTUA  | A03 | 21655250 | 21661978 |
| A04p24620.1_BraTUA | <i>Brassica rapa</i> BraTUA  | A04 | 16803042 | 16807920 |
| A02p27510.1_BraTUE | <i>Brassica rapa</i> BraTUE  | A02 | 16044120 | 16049605 |
| A02p28510.1_BraTUE | <i>Brassica rapa</i> BraTUE  | A02 | 16897813 | 16907210 |
| A02p44980.1_BraTUE | <i>Brassica rapa</i> BraTUE  | A02 | 29906621 | 29909939 |
| A02p45000.1_BraTUE | <i>Brassica rapa</i> BraTUE  | A02 | 29918379 | 29923559 |
| A03p43290.1_BraTUE | <i>Brassica rapa</i> BraTUE  | A03 | 21400608 | 21402780 |
| A03p43300.1_BraTUE | <i>Brassica rapa</i> BraTUE  | A03 | 21408678 | 21414281 |
| A03p43310.1_BraTUE | <i>Brassica rapa</i> BraTUE  | A03 | 21430639 | 21433428 |
| BraA02t07413Z      | <i>Brassica rapa</i> BraPaZ1 | A02 | 15881597 | 15884186 |



|                                          |                                  |       |          |          |
|------------------------------------------|----------------------------------|-------|----------|----------|
| <i>BraA02t07492Z</i>                     | <i>Brassica rapa</i> BrapaZ1     | A02   | 16577334 | 16587104 |
| <i>BraA02t09063Z</i>                     | <i>Brassica rapa</i> BrapaZ1     | A02   | 29723188 | 29727132 |
| <i>BraA03t13773Z</i>                     | <i>Brassica rapa</i> BrapaZ1     | A03   | 21573766 | 21576003 |
| <i>BraA03t13775Z</i>                     | <i>Brassica rapa</i> BrapaZ1     | A03   | 21579649 | 21584763 |
| <i>A03Pse1_A02-36849703-36855070</i>     | <i>Brassica rapa</i> A03         | A02   | 36849703 | 36855070 |
| <i>A03Pse2_A02-36848777-36854980</i>     | <i>Brassica rapa</i> A03         | A02   | 36848777 | 36854980 |
| <i>B03Pse_chr02-19603547-19612312</i>    | Turnip B03                       | chr02 | 19603547 | 19612312 |
| <i>Brapa3.5Pse_A02-29594897-29598097</i> | <i>Brassica rapa</i> Chiifu v3.5 | A02   | 29594897 | 29598097 |
| <i>BrasPse_A02-30297367-30300169</i>     | <i>Brassica rapa</i> chinensis   | A02   | 30297367 | 30300169 |
| <i>ZIPse1_A02-29711994-29714276</i>      | <i>Brassica rapa</i> BrapaZ1     | A02   | 29711994 | 29714276 |
| <i>ZIPse2_A02-29712920-29714366</i>      | <i>Brassica rapa</i> BrapaZ1     | A02   | 29712920 | 29714366 |
| <i>CCAPse_A02-29998086-29999523</i>      | <i>Brassica rapa</i> BraCCA      | A02   | 29998086 | 29999523 |
| <i>CCBPse_A02-28706225-28707370</i>      | <i>Brassica rapa</i> BraCCB      | A02   | 28706225 | 28707370 |
| <i>CXAPse_A02-30553266-30554561</i>      | <i>Brassica rapa</i> BraCXA      | A02   | 30553266 | 30554561 |
| <i>CXBPse_A02-30063246-30064540</i>      | <i>Brassica rapa</i> BraCXB      | A02   | 30063246 | 30064540 |
| <i>ECD04Pse_A02-31123336-31124417</i>    | Turnip ECD04                     | A02   | 31123336 | 31124417 |
| <i>MIZPse_A02-30232218-30233663</i>      | <i>Brassica rapa</i> BraMIZ      | A02   | 30232218 | 30233663 |
| <i>PCAPse_A02-31272395-31273689</i>      | <i>Brassica rapa</i> BraPCA      | A02   | 31272395 | 31273689 |
| <i>PCBPse_A02-31181778-31187146</i>      | <i>Brassica rapa</i> BraPCA      | A02   | 31181778 | 31187146 |
| <i>TCAPse_A02-30173713-30175007</i>      | <i>Brassica rapa</i> BraTCA      | A02   | 30173713 | 30175007 |
| <i>TUAPse_A02-28525263-28530631</i>      | <i>Brassica rapa</i> BraTUA      | A02   | 28525263 | 28530631 |
| <i>TUEPse_A02-29906028-29908309</i>      | <i>Brassica rapa</i> BraTUE      | A02   | 29906028 | 29908309 |

624

625

626 **Supplemental Table 18. *AOP* genes in turnip**

|      | <i>A. thaliana</i> | Turnip        |
|------|--------------------|---------------|
| AOP1 | AT4G03070.1        | Gene0096740.1 |
|      |                    | Gene0493910.1 |
|      |                    | Gene0445090.1 |
| AOP2 | AT4G03060.1        | Gene0250680.1 |
|      |                    | Gene0405960.1 |
|      |                    | Gene0486840.1 |

627

628

629

630

631

632

633

634

635

636

637

638

639

640

641 Supplemental Table 19. Primers used in this study

| Gene name                                                             | Forward primer (5'-3') | Reverse primer (5'-3') |
|-----------------------------------------------------------------------|------------------------|------------------------|
| <b>The primers for real-time quantitative PCR (qRT-PCR) analysis.</b> |                        |                        |
| <i>Gene0495830</i>                                                    | CTATCCGCACAAGAAGCCAAC  | GACGGGCTGGAGGTCAATAC   |
| <i>Gene0352400</i>                                                    | CCTTTCACTCTCCCGGTCTG   | ACGGAGCGTCGTGTCAAATA   |
| <i>Gene0121420</i>                                                    | ATGATCTCCATCTCCCCCACT  | TAGCACCAGTCCCAGCCTTA   |
| <i>Gene0100730</i>                                                    | CTTCTGGCATCTCCCGCAAT   | GTACTTCGGCCATCGTTCCA   |
| <i>Gene0027070</i>                                                    | ATGTCCCACAATGATCCCCAC  | CGATTCAGGCGTAGAGAGGG   |
| <i>Gene0000760</i>                                                    | CCCTTACTCCACCGCAGAAG   | CACGGTTTTGGCGATGGTTT   |
| <i>Gene0006750</i>                                                    | GGAGCATTGTGATGGGTGG    | CAAATGCCTGAATTTGAGATTT |
| <i>Gene0228790</i>                                                    | AAGTGGAATGCACCACTTGA   | TTACCGCCTTACCATCTTGCT  |
| <i>Gene0464890</i>                                                    | TAAGGCGGCTTGGGAATCAG   | ATGTTGATCCCCACCGTGTC   |
| <i>Gene0096740</i>                                                    | GACAAAGTGTGAGTGGAGC    | CATGAGGACGAGGTGGTGTATA |
| <i>Gene0493910</i>                                                    | CAAAGTGGGATGAAGTGAAG   | CTCTGAGAACTTGTGCATCGTC |
| <i>Gene0445090</i>                                                    | AGTGGGATAAAGTGAAGGCTG  | GCGTCGAGAACTTGTGCATCAT |
| <i>Gene0250680</i>                                                    | GAGGAGTGATGTCCGTAAAGC  | CATCCAATTCTGCTAACTTCT  |
| <i>Gene0405960</i>                                                    | GTCCGTAAAGCTCTTGAAGAC  | CATTGACTTGAGGTTCTCATCA |
| <i>Gene0486840</i>                                                    | ACAAGAGTACCAGCGAAAGG   | CGCCAGCACCAACATCCGCACC |
| <i>BraA03g029130</i>                                                  | GGGACAAAGTGAAGACTGATG  | ACACCACCTCGTCCTCATGAAG |
| <i>BraA09g001350</i>                                                  | CTCTCTGAATCTCTTGAGCTCC | TGAGACGATGCACAAATTCGC  |
| <i>BraA09g001340</i>                                                  | ATAAAGTGAAGGCTGATGTCC  | GATGATGCACAAGTTCTCGACG |
| <i>BraA09g001360</i>                                                  | CGTAAAGCTCTTGAAGACTAC  | GCTGATGCTGATGATATTGCT  |
| <i>BraA02g028320</i>                                                  | TAAAGCAATCGGTTTTGGAAG  | CCCCTGCAACATTAGTATCA   |
| <i>BraA02g029140</i>                                                  | AAGATGATTAGCGAGCCGG    | CGCGTCGATTCCCATCTCTAG  |
| <i>BraA03g044240</i>                                                  | CCTTTCACTCTCCCGGTCTG   | ACGGAGCGTCGTGTCAAATA   |
| <i>BraA03g044250</i>                                                  | ATGATCTCCATCTCCCCCACT  | TAGCACCAGTCCCAGCCTTA   |
| <i>BraA03g044270</i>                                                  | CTTCTGGCATCTCCCGCAAT   | GTACTTCGGCCATCGTTCCA   |
| <i>BraA02g044520</i>                                                  | CCCTTACTCCACCGCAGAAG   | CACGGTTTTGGCGATGGTTT   |
| <i>BraA02g044510</i>                                                  | AAAGTGGAATGCACCACTTGA  | TTACCGCCTTACCATCTTGCT  |

|                      |                       |                         |
|----------------------|-----------------------|-------------------------|
| <i>BraA02g027460</i> | TCTCCAGGTGGAGCCCTTAC  | CGCATATTACCGGGACGTATC   |
| <i>BraA02g028300</i> | GCCGCAACTAGTAGTATTGAC | GAGTTGCCTAGCAATCTCTAC   |
| <i>BraA04g026170</i> | ACATTCACATGAAATATAAG  | ATGCCACCCGTGGTTGCACC    |
| <i>TUB2</i>          | AGGCGTGTGAGTGAGCAGTT  | CATCTCGTCCATTCTTCACCTGT |

---

**The primers for RT-PCR analysis.**

---

|                      |                       |                         |
|----------------------|-----------------------|-------------------------|
| <i>BAA02g29590</i>   | TACCGCCAACACAATCTCCG  | GGCCCCAATGTCTTCTGGTG    |
| <i>BAA02g29600</i>   | ACCTATCCGCACAAGAAGCC  | CAACGGTCTTGGCAATGCTT    |
| <i>Gene0495830</i>   | TACGTCCCGGTAATATGCGTC | GCTCCACGACATTTCAAAGC    |
| <i>Gene0405960</i>   | GCTGATGCCAATGCTAATAC  | TGAATGGTTTGAAGACTCGT    |
| <i>Gene0250680</i>   | ACTGGTGATTGTGCTAATGT  | TAAGCGTGAAGAGTAGAACG    |
| <i>Gene0486840</i>   | AACCCTAAAACCAGGAAGTG  | CCCAAAGCTCTCAAATACCA    |
| <i>BraA02g028320</i> | AGTATCAGCGAAACAATCCA  | ACCTCCAAACCTTCAATCTC    |
| <i>BraA09g001360</i> | AACACCTCAAGTCAACGAAT  | CCTCCAAACCTTCAATCTCA    |
| <i>BraA03g029140</i> | CGTCTACGACTGATGAAGTA  | CAGCGATAACAACGAAAGTG    |
| <i>Actin</i>         | CCTGGTCAGCTTAACTCCGAC | CATCTCGTCCATTCTTCACCTGT |

---
